# Supplementary material
Source: publisher site journal article supplement (https://www.dovepress.com/article/583771)
Supplement: Supplementary file 1 [file 583771%20Revised%20Supplementary%20Materials.docx]

**Supplementary Materials**

**Sex-Specific Basal Metabolic Rate and NAFLD Risk: The Multi-Population Observational and Mendelian Randomization Study**

**Table S1. Demographic and clinical characteristics of the participants stratified by sex in health examination data.**

|  | **Males (n=9856)** | | |  | **Females (n=20,989)** | | |
| --- | --- | --- | --- | --- | --- | --- | --- |
| **Characteristics** | **Non-NAFLD** | **NAFLD** | ***P* value** |  | **Non-NAFLD** | **NAFLD** | ***P* value** |
| **n=6766 (68.6%)** | **n=3090 (31.4%)** |  | **n=18,812 (89.6%)** | **n=2177 (10.4%)** |
| **Age (years)** | 39.9 (12.6) | 41.5 (11) | <0.001 |  | 39 (11.4) | 48.4 (11) | <0.001 |
| **Han Chinese (%)** | 5564 (82.2%) | 2461 (79.6%) | 0.002 |  | 15828 (84.1%) | 1779 (81.7%) | 0.004 |
| **Married/Cohabiting (%)** | 4536 (67%) | 2338 (75.7%) | <0.001 |  | 13,460 (71.6%) | 1813 (83.3%) | <0.001 |
| **Smoking status (%)** |  |  |  |  |  |  |  |
| Never | 4398 (65%) | 1844 (59.7%) | <0.001 |  | 18,361 (97.6%) | 2116 (97.2%) | 0.322 |
| Former | 524 (7.7%) | 250 (8.1%) |  |  | 111 (0.6%) | 12 (0.6%) |  |
| Current smoking | 1842 (27.2%) | 996 (32.2%) |  |  | 338 (1.8%) | 49 (2.3%) |  |
| **Work-related PA (%)** |  |  | <0.001 |  |  |  | <0.001 |
| Moderate to vigorous | 853 (12.6%) | 256 (8.3%) |  |  | 1473 (7.8%) | 229 (10.5%) |  |
| Light | 2772 (41%) | 1261 (40.8%) |  |  | 7842 (41.7%) | 1067 (49%) |  |
| Sedentary | 3139 (46.4%) | 1571 (50.9%) |  |  | 9484 (50.4%) | 880 (40.4%) |  |
| **BMI (kg/m2)** | 23.2 (2.9) | 27.2 (3.3) | <0.001 |  | 22.1 (2.9) | 26.7 (3.2) | <0.001 |
| **WC (cm)** | 81.3 (7.9) | 92.1 (7.9) | <0.001 |  | 73.6 (7.8) | 86.4 (8.2) | <0.001 |
| **SBP (mmHg)** | 122 (15.2) | 129.2 (16.2) | <0.001 |  | 115.6 (15.4) | 130.8 (18.9) | <0.001 |
| **DBP (mmHg)** | 75.9 (11) | 81.7 (11.6) | <0.001 |  | 71.8 (10.5) | 79.7 (11.8) | <0.001 |
| **Overweight/Obesity (%)** | 2583 (38.2%) | 2705 (87.5%) | <0.001 |  | 4167 (22.2%) | 1747 (80.2%) | <0.001 |
| **Hypertension (%)** | 1149 (17%) | 1065 (34.5%) | <0.001 |  | 1933 (10.3%) | 810 (37.3%) | <0.001 |
| **Diabetes (%)** | 267 (3.9%) | 370 (12%) | <0.001 |  | 306 (1.6%) | 319 (14.7%) | <0.001 |
| **Dyslipidemia (%)** | 1936 (29.9%) | 1931 (64%) | <0.001 |  | 2549 (14.2%) | 1049 (49.5%) | <0.001 |
| **TC (mg/dL)** | 188.3 (35.7) | 201.8 (38.8) | <0.001 |  | 186.6 (35.8) | 204.7 (41) | <0.001 |
| **TG (mg/dL)** | 124.9 (82.3) | 218.6 (154.1) | <0.001 |  | 97.5 (62.3) | 190.3 (139.4) | <0.001 |
| **LDL-C (mg/dL)** | 109.8 (26.7) | 118.6 (27.4) | <0.001 |  | 104.2 (25.8) | 117.3 (27.7) | <0.001 |
| **HDL-C (mg/dL)** | 49.4 (10.2) | 43.1 (8.4) | <0.001 |  | 58.4 (11.5) | 49.6 (10.4) | <0.001 |
| **Fasting glucose (mg/dL)** | 98.7 (20.9) | 107.8 (31) | <0.001 |  | 95.1 (11.9) | 111 (33.1) | <0.001 |
| **GGT (IU/L)** | 27.8 (22.6) | 50.1 (44.6) | <0.001 |  | 18.8 (20) | 34.8 (31) | <0.001 |
| **AST (IU/L)** | 24.7 (20) | 29.7 (26.4) | <0.001 |  | 21.4 (10.9) | 26.4 (14.9) | <0.001 |
| **ALT (IU/L)** | 26.8 (26.2) | 43.7 (29.3) | <0.001 |  | 17.4 (14.6) | 29.6 (22.7) | <0.001 |
| **ALP (IU/L)** | 85.3 (22.6) | 89.6 (23.7) | <0.001 |  | 71.2 (24) | 88.7 (26.6) | <0.001 |
| **BMR (Harris-Benedict, kcal/day)** | 1541.4 (168.6) | 1687.2 (192.1) | <0.001 |  | 1265.1 (87.3) | 1313.6 (113.3) | <0.001 |
| **BMR (Mifflin-St Jeor, kcal/day)** | 1506.7 (145.4) | 1614.5 (160.8) | <0.001 |  | 1165.2 (107.8) | 1210.4 (135.7) | <0.001 |

Data were presented as mean (SD) or n (%).

ANOVA or t-test for continuous variables. Chi-squared or Fisher's exact test for categorical variables.

Apart from major independent variables (e.g. basal metabolic rate), there were some missing data in certain variables.

Abbreviations: ALP, alkaline phosphatase; ALT, alanine aminotransferase; AST, aspartate aminotransferase; BMI, body mass index; BMR, basal metabolic rate; DBP, diastolic blood pressure; GGT, gamma-glutamyl transpeptidase; HDL-C, high-density lipoprotein cholesterol; LDL-C, low-density lipoprotein cholesterol; NAFLD, non-alcoholic fatty liver disease; SBP, systolic blood pressure; TC, total cholesterol; TG, triglyceride; WC, waist circumference; PA, physical activity

**Table S2. Demographic and clinical characteristics of the participants stratified by sex in NHANES 2017-2020.**

|  | **Males (n=2350)** | | |  | **Females (n=2669)** | | |
| --- | --- | --- | --- | --- | --- | --- | --- |
| **Characteristics** | **Non-NAFLD** | **NAFLD** | ***P* value** |  | **Non-NAFLD** | **NAFLD** | ***P* value** |
| **Unweighted number (%)** | 1562 (66.5%) | 788 (33.5%) |  |  | 2026 (75.9%) | 643 (24.1%) |  |
| **Weighted number** | 46,355,625.47 | 22,034,469.96 |  |  | 57,174,348.36 | 16,423,696.60 |  |
| **Age (years)** | 43.40 (15.96) | 47.47 (15.64) | 0.001 |  | 46.88 (17.14) | 52.10 (14.49) | <0.001 |
| **Race (%)** |  |  | <0.001 |  |  |  | <0.001 |
| Hispanic | 14.40% | 20.00% |  |  | 15.30% | 20.00% |  |
| Non-Hispanic White | 60.60% | 60.90% |  |  | 59.40% | 56.20% |  |
| Non-Hispanic Black | 13.70% | 8.60% |  |  | 13.60% | 12.40% |  |
| Non-Hispanic Asian | 7.40% | 7.40% |  |  | 8.20% | 5.90% |  |
| Others | 3.90% | 3.20% |  |  | 3.50% | 5.50% |  |
| **Married/Cohabiting (%)** | 37.30% | 23.10% | <0.001 |  | 39.50% | 37.20% | <0.001 |
| **Smoking status (%)** |  |  | <0.001 |  |  |  | <0.001 |
| Never | 26.10% | 33.00% |  |  | 18.80% | 20.60% |  |
| Former | 59.50% | 57.30% |  |  | 70.00% | 66.70% |  |
| Current smoking | 14.30% | 9.70% |  |  | 11.20% | 12.70% |  |
| **Physical activity (%)** |  |  | <0.001 |  |  |  | <0.001 |
| <600 MET-min/week | 20.60% | 35.00% |  |  | 34.70% | 48.40% |  |
| ≥600 and <1200 MET-min/week | 9.10% | 7.10% |  |  | 12.60% | 7.90% |  |
| ≥1200 MET-min/week | 70.30% | 58.00% |  |  | 52.80% | 43.70% |  |
| **High school or above (%)** | 90.00% | 89.70% | <0.001 |  | 90.30% | 88.00% | <0.001 |
| **Poverty income ratio (PIR)** | 3.42 (1.61) | 3.16 (1.61) | 0.047 |  | 3.15 (1.65) | 2.96 (1.62) | 0.123 |
| **BMI (kg/m2)** | 27.10 (4.49) | 34.09 (6.50) | <0.001 |  | 27.48 (6.39) | 36.84 (8.55) | <0.001 |
| **WC (cm)** | 95.66 (12.17) | 114.94 (15.19) | <0.001 |  | 92.41 (14.69) | 113.34 (15.96) | <0.001 |
| **SBP (mmHg)** | 121.33 (13.03) | 125.88 (14.42) | <0.001 |  | 117.18 (18.13) | 122.98 (18.74) | <0.001 |
| **DBP (mmHg)** | 73.37 (9.74) | 78.00 (10.36) | <0.001 |  | 71.51 (10.29) | 76.38 (11.26) | <0.001 |
| **Overweight/Obesity (%)** | 67.20% | 95.50% | <0.001 |  | 59.50% | 95.50% | <0.001 |
| **Hypertension (%)** | 22.30% | 46.60% | <0.001 |  | 25.50% | 49.00% | <0.001 |
| **Diabetes (%)** | 7.60% | 23.90% | <0.001 |  | 5.50% | 32.50% | <0.001 |
| **Dyslipidemia (%)** | 84.90% | 69.70% | <0.001 |  | 95.90% | 87.20% | <0.001 |
| **TC (mg/dL)** | 184.17 (39.90) | 188.71 (39.17) | 0.076 |  | 190.10 (37.56) | 193.74 (39.85) | 0.093 |
| **TG (mg/dL)** | 102.64 (110.43) | 155.67 (132.20) | <0.001 |  | 84.96 (45.92) | 137.39 (75.55) | <0.001 |
| **LDL-C (mg/dL)** | 110.94 (37.79) | 114.36 (33.27) | 0.355 |  | 110.96 (33.15) | 112.62 (35.58) | 0.602 |
| **HDL-C (mg/dL)** | 49.95 (11.93) | 43.72 (11.22) | <0.001 |  | 61.21 (15.64) | 50.83 (12.71) | <0.001 |
| **Fasting glucose (mg/dL)** | 106.49 (28.32) | 121.97 (44.51) | 0.001 |  | 101.05 (18.42) | 118.82 (34.77) | <0.001 |
| **GGT (IU/L)** | 28.02 (24.76) | 43.77 (46.06) | <0.001 |  | 19.00 (20.63) | 31.38 (33.23) | <0.001 |
| **AST (U/L)** | 22.11 (9.64) | 25.81 (14.03) | <0.001 |  | 18.65 (8.18) | 21.36 (14.20) | <0.001 |
| **ALT (U/L)** | 23.19 (13.17) | 34.18 (21.44) | <0.001 |  | 16.37 (9.55) | 23.40 (15.06) | <0.001 |
| **ALP (IU/L)** | 71.57 (19.37) | 76.36 (23.48) | 0.024 |  | 71.61 (22.90) | 83.05 (25.83) | <0.001 |
| **Median CAP (dB/m)** | 238.21 (38.88) | 342.76 (31.88) | <0.001 |  | 228.03 (42.99) | 338.51 (29.20) | <0.001 |
| **Median stiffness (kPa)** | 5.03 (1.33) | 7.99 (7.83) | <0.001 |  | 4.57 (1.39) | 7.32 (4.99) | <0.001 |
| **BMR (Harris-Benedict, kcal/day)** | 1793.65 (248.84) | 2076.53 (363.32) | <0.001 |  | 1402.16 (184.55) | 1602.54 (262.02) | <0.001 |
| **BMR (Mifflin-St Jeor, kcal/day)** | 1711.28 (202.47) | 1921.40 (288.94) | <0.001 |  | 1323.24 (211.79) | 1537.31 (295.86) | <0.001 |

Data were weighted estimates and presented as mean (SD) or %.

The weighted generalized linear regression (continuous variables) or weighted Chi-squared test (categoric variables) were utilized to compare differences.

Apart from major independent variables (e.g. basal metabolic rate), there were some missing data in certain variables.

Abbreviations: ALP, alkaline phosphatase; ALT, alanine aminotransferase; AST, aspartate aminotransferase; BMI, body mass index; BMR, basal metabolic rate; CAP, controlled attenuation parameter; DBP, diastolic blood pressure; GGT, gamma-glutamyl transpeptidase; HDL-C, high-density lipoprotein cholesterol; LDL-C, low-density lipoprotein cholesterol; NAFLD, non-alcoholic fatty liver disease; SBP, systolic blood pressure; TC, total cholesterol; TG, triglyceride; WC, waist circumference.

**Table S3. Association between basal metabolic rate and non-alcoholic fatty liver disease in health examination subjects.**

| **Group** | **No. (cases)** | **OR (95% CI)** | | | | |  |
| --- | --- | --- | --- | --- | --- | --- | --- |
| **Model 1** | ***P* value** | **Model 2** | ***P* value** | **Model 3** | ***P* value** |
| **(1) Main analysis: BMR calculated using Mifflin-St Jeor equation and divided into quartile groups.** | | | | |  |  |  |
| **All** |  |  |  |  |  |  |  |
| BMR (Quartile 1) | 7713 (649) | Ref |  | Ref |  | Ref |  |
| BMR (Quartile 2) | 7713 (652) | 1.96 (1.75–2.19) | 7.52E-31 | 1.91 (1.71–2.15) | 6.09E-29 | 1.17 (1.03–1.33) | 1.33E-02 |
| BMR (Quartile 3) | 7709 (1111) | 4.95 (4.41–5.55) | 2.18E-162 | 4.82 (4.30–5.41) | 1.10E-156 | 1.83 (1.60–2.09) | 3.04E-19 |
| BMR (Quartile 4) | 7710 (2855) | 46.61 (39.43–55.17) | 0.00E+00 | 44.84 (37.91–53.09) | 0.00E+00 | 5.98 (4.92–7.28) | 3.50E-71 |
| BMR (Mifflin-St Jeor, SD) | 30845 (5267) | 7.81 (7.22–8.47) | 0.00E+00 | 7.76 (7.16–8.42) | 0.00E+00 | 3.17 (2.93–3.43) | 1.68E-173 |
| *P* for trend |  | <0.001 |  | <0.001 |  | <0.001 |  |
| **Male** |  |  |  |  |  |  |  |
| BMR (Quartile 1) | 2466 (362) | Ref |  | Ref |  | Ref |  |
| BMR (Quartile 2) | 2464 (654) | 4.21 (3.59–4.95) | 8.10E-68 | 3.96 (3.38–4.66) | 1.84E-62 | 2.00 (1.67–2.39) | 4.35E-14 |
| BMR (Quartile 3) | 2464 (818) | 8.10 (6.84–9.62) | 2.94E-124 | 7.50 (6.33–8.90) | 5.13E-116 | 2.71 (2.24–3.29) | 2.09E-24 |
| BMR (Quartile 4) | 2462 (1256) | 24.76 (20.56–29.91) | 4.03E-234 | 23.04 (19.13–27.82) | 8.88E-225 | 4.91 (3.97–6.10) | 3.84E-47 |
| BMR (Mifflin-St Jeor, SD) | 9856 (3090) | 3.93 (3.64–4.24) | 1.15E-254 | 3.88 (3.59–4.20) | 8.96E-237 | 2.14 (1.97–2.33) | 3.44E-71 |
| *P* for trend |  | <0.001 |  | <0.001 |  | <0.001 |  |
| **Female** |  |  |  |  |  |  |  |
| BMR (Quartile 1) | 5277 (425) | Ref |  | Ref |  | Ref |  |
| BMR (Quartile 2) | 5233 (448) | 2.77 (2.40–3.20) | 7.83E-44 | 2.76 (2.39–3.19) | 1.81E-43 | 1.64 (1.41–1.92) | 2.54E-10 |
| BMR (Quartile 3) | 5235 (463) | 4.45 (3.84–5.17) | 7.81E-85 | 4.42 (3.81–5.13) | 1.36E-83 | 1.93 (1.64–2.27) | 1.64E-15 |
| BMR (Quartile 4) | 5244 (841) | 14.74 (12.66–17.19) | 3.97E-253 | 14.58 (12.52–17.01) | 2.34E-250 | 4.04 (3.41–4.81) | 1.38E-56 |
| BMR (Mifflin-St Jeor, SD) | 20989 (2177) | 3.10 (2.89–3.34) | 4.65E-208 | 3.09 (2.88–3.32) | 1.63E-210 | 1.92 (1.80–2.04) | 9.24E-95 |
| *P* for trend |  | <0.001 |  | <0.001 |  | <0.001 |  |
| *P* for interation |  |  |  |  |  | 5.85E-01 |  |
| **(2) Sensitivity analysis: BMR calculated using Mifflin-St Jeor equation and divided into tertile groups.** | | | | |  |  |  |
| **All** |  |  |  |  |  |  |  |
| BMR (Tertile 1) | 10285 (852) | Ref |  | Ref |  | Ref |  |
| BMR (Tertile 2) | 10280 (1074) | 2.12 (1.93–2.33) | 1.16E-53 | 2.09 (1.90–2.30) | 1.18E-51 | 1.23 (1.11–1.38) | 1.52E-04 |
| BMR (Tertile 3) | 10280 (3341) | 12.50 (10.98–14.24) | 8.28E-311 | 12.27 (10.77–13.98) | 5.83E-303 | 2.89 (2.47–3.39) | 2.71E-39 |
| *P* for trend |  | <0.001 |  | <0.001 |  | <0.001 |  |
| **Male** |  |  |  |  |  |  |  |
| BMR (Tertile 1) | 3286 (549) | Ref |  | Ref |  | Ref |  |
| BMR (Tertile 2) | 3287 (984) | 4.07 (3.55–4.66) | 2.15E-88 | 3.86 (3.37–4.42) | 1.45E-82 | 1.94 (1.66–2.26) | 4.73E-17 |
| BMR (Tertile 3) | 3283 (1557) | 13.16 (11.29–15.39) | 4.12E-221 | 12.41 (10.64–14.50) | 2.37E-213 | 3.42 (2.86–4.09) | 9.17E-41 |
| *P* for trend |  | <0.001 |  | <0.001 |  | <0.001 |  |
| **Female** |  |  |  |  |  |  |  |
| BMR (Tertile 1) | 7006 (590) | Ref |  | Ref |  | Ref |  |
| BMR (Tertile 2) | 6990 (579) | 2.58 (2.27–2.93) | 4.03E-48 | 2.56 (2.26–2.91) | 2.19E-47 | 1.43 (1.25–1.64) | 2.75E-07 |
| BMR (Tertile 3) | 6993 (1008) | 8.54 (7.49–9.75) | 3.32E-219 | 8.45 (7.41–9.64) | 8.10E-217 | 2.81 (2.42–3.26) | 2.17E-42 |
| *P* for trend |  | <0.001 |  | <0.001 |  | <0.001 |  |
| *P* for interation |  |  |  |  |  | **2.48E-05** |  |
| **(3) Sensitivity analysis: BMR calculated using Harris-Benedict equation and divided into quartile groups.** | | | | |  |  |  |
| **All** |  |  |  |  |  |  |  |
| BMR (Quartile 1) | 7712 (572) | Ref |  | Ref |  | Ref |  |
| BMR (Quartile 2) | 7711 (608) | 2.13 (1.89–2.39) | 2.88E-36 | 2.09 (1.85–2.35) | 2.57E-34 | 1.21 (1.06–1.38) | 4.65E-03 |
| BMR (Quartile 3) | 7711 (1147) | 5.99 (5.34–6.71) | 7.13E-206 | 5.85 (5.23–6.56) | 6.33E-200 | 2.03 (1.78–2.32) | 8.91E-26 |
| BMR (Quartile 4) | 7711 (2940) | 52.48 (44.86–61.48) | 0.00E+00 | 51.03 (43.60–59.82) | 0.00E+00 | 6.57 (5.45–7.93) | 1.22E-85 |
| BMR (Harris-Benedict, SD) | 30845 (5267) | 6.81 (6.31–7.36) | 0.00E+00 | 6.80 (6.29–7.36) | 0.00E+00 | 3.06 (2.84–3.29) | 1.03E-192 |
| *P* for trend |  | <0.001 |  | <0.001 |  | <0.001 |  |
| **Male** |  |  |  |  |  |  |  |
| BMR (Quartile 1) | 2464 (318) | Ref |  | Ref |  | Ref |  |
| BMR (Quartile 2) | 2464 (600) | 4.26 (3.61–5.03) | 2.56E-64 | 4.01 (3.40–4.74) | 3.19E-59 | 1.99 (1.65–2.39) | 3.76E-13 |
| BMR (Quartile 3) | 2464 (832) | 9.22 (7.76–10.99) | 1.27E-134 | 8.56 (7.21–10.20) | 2.57E-126 | 2.95 (2.43–3.60) | 3.68E-27 |
| BMR (Quartile 4) | 2464 (1340) | 31.32 (25.94–37.93) | 1.72E-260 | 29.12 (24.12–35.26) | 1.70E-250 | 5.85 (4.70–7.31) | 1.27E-54 |
| BMR (Harris-Benedict, SD) | 9856 (3090) | 4.35 (4.03–4.71) | 6.10E-279 | 4.30 (3.97–4.65) | 3.58E-268 | 2.37 (2.18–2.59) | 8.78E-84 |
| *P* for trend |  | <0.001 |  | <0.001 |  | <0.001 |  |
| **Female** |  |  |  |  |  |  |  |
| BMR (Quartile 1) | 5248 (373) | Ref |  | Ref |  | Ref |  |
| BMR (Quartile 2) | 5247 (430) | 3.14 (2.71–3.64) | 4.28E-52 | 3.13 (2.70–3.63) | 1.47E-51 | 1.74 (1.48–2.04) | 1.28E-11 |
| BMR (Quartile 3) | 5247 (434) | 4.84 (4.15–5.64) | 1.35E-89 | 4.83 (4.15–5.64) | 4.99E-89 | 1.93 (1.63–2.28) | 3.66E-14 |
| BMR (Quartile 4) | 5247 (940) | 19.05 (16.36–22.23) | 6.87E-300 | 18.92 (16.24–22.09) | 3.08E-297 | 4.64 (3.88–5.56) | 2.64E-62 |
| BMR (Harris-Benedict, SD) | 20989 (2177) | 3.39 (2.92–3.96) | 7.65E-56 | 3.38 (2.92–3.94) | 1.44E-56 | 2.10 (1.97–2.24) | 5.98E-110 |
| *P* for trend |  | <0.001 |  | <0.001 |  | <0.001 |  |
| *P* for interation |  |  |  |  |  | 2.96E-01 |  |
| **(4) Sensitivity analysis: BMR calculated using Harris-Benedict equation and divided into tertile groups.** | | | | |  |  |  |
| BMR (Tertile 1) | 10282 (773) | Ref |  | Ref |  | Ref |  |
| BMR (Tertile 2) | 10281 (1055) | 2.42 (2.20–2.67) | 4.76E-71 | 2.39 (2.17–2.64) | 9.13E-69 | 1.25 (1.12–1.40) | 8.98E-05 |
| BMR (Tertile 3) | 10282 (3439) | 15.02 (13.34–16.93) | 0.00E+00 | 14.74 (13.09–16.62) | 0.00E+00 | 3.09 (2.67–3.57) | 3.13E-51 |
| *P* for trend |  | <0.001 |  | <0.001 |  | <0.001 |  |
| **Male** |  |  |  |  |  |  |  |
| BMR (Tertile 1) | 3286 (470) | Ref |  | Ref |  | Ref |  |
| BMR (Tertile 2) | 3285 (985) | 4.84 (4.21–5.57) | 2.52E-104 | 4.60 (4.00–5.30) | 2.09E-98 | 2.18 (1.86–2.56) | 6.42E-22 |
| BMR (Tertile 3) | 3285 (1635) | 17.09 (14.61–20.05) | 5.63E-255 | 16.13 (13.79–18.91) | 4.40E-247 | 4.05 (3.37–4.87) | 4.07E-49 |
| *P* for trend |  | <0.001 |  | <0.001 |  | <0.001 |  |
| **Female** |  |  |  |  |  |  |  |
| BMR (Tertile 1) | 6998 (511) | Ref |  | Ref |  | Ref |  |
| BMR (Tertile 2) | 6995 (578) | 3.05 (2.68–3.47) | 5.26E-63 | 3.05 (2.68–3.48) | 7.56E-63 | 1.58 (1.37–1.82) | 1.82E-10 |
| BMR (Tertile 3) | 6996 (1088) | 10.86 (9.52–12.42) | 1.79E-263 | 10.80 (9.46–12.35) | 1.08E-261 | 3.08 (2.64–3.59) | 2.06E-46 |
| *P* for trend |  | <0.001 |  | <0.001 |  | <0.001 |  |
| *P* for interation |  |  |  |  |  | **8.44E-07** |  |

BMR groups: in main analysis, ≤1131.8, 1131.8−≤1229.4, 1229.4−≤1435.5, and >1435.5 kcal/day for total population; ≤1436.9, 1436.9−≤1535.6, 1535.6−≤1636.8, and >1636.8 kcal/day for males; ≤1099.0, 1099.0−≤1166.5, 1166.5−≤1237.6, and >1237.6 kcal/day for females

Model 1: adjusted for age, sex, year of physical examination, as appropriate.

Model 2: further adjusted for race/ethnic, marital status, smoking status, and work-related physical activity.

Model 3: further adjusted for overweight/obesity, hypertension, diabetes, and dyslipidemia.

Bolded values are *P*-values indicating a significant interaction effect.

Ref denotes the reference group.

Abbreviations: BMR, basal metabolic rate; OR, odds ratio; CI, confidence interval.

**Table S4. Association between basal metabolic rate and non-alcoholic fatty liver disease in NHANES 2017-2020.**

| **Group** | **No. (cases)** | **OR (95% CI)** | | | | |  |
| --- | --- | --- | --- | --- | --- | --- | --- |
| **Model 1** | ***P* value** | **Model 2** | ***P* value** | **Model 3** | ***P* value** |
| **(1) Main analysis: BMR calculated using Mifflin-St Jeor equation and divided into quartile groups.** | | | | |  |  |  |
| **All** |  |  |  |  |  |  |  |
| BMR (Quartile 1) | 1258 (184) | Ref | 1 | Ref | 1 | Ref | 1 |
| BMR (Quartile 2) | 1252 (267) | 2.88 (1.94–4.27) | 1.75E-05 | 3.22 (2.03–5.10) | 2.83E-04 | 1.84 (0.95–3.54) | 6.27E-02 |
| BMR (Quartile 3) | 1254 (368) | 7.77 (4.87–12.40) | 1.40E-08 | 10.71 (5.84–19.65) | 9.82E-06 | 4.98 (2.28–10.89) | 3.24E-03 |
| BMR (Quartile 4) | 1255 (612) | 32.79 (20.00–53.77) | 3.40E-12 | 49.91 (27.98–89.03) | 9.57E-08 | 16.10 (6.69–38.72) | 4.55E-04 |
| BMR (Mifflin-St Jeor, SD) | 5019 (1431) | 4.99 (4.22–5.90) | 1.35E-15 | 6.57 (5.39–8.01) | 3.26E-10 | 4.69 (3.66–6.02) | 1.61E-06 |
| *P* for trend |  | <0.001 |  | <0.001 |  | <0.001 |  |
| **Male** |  |  |  |  |  |  |  |
| BMR (Quartile 1) | 588 (115) | Ref | 1 | Ref | 1 | Ref | 1 |
| BMR (Quartile 2) | 588 (150) | 1.83 (1.05–3.17) | 3.39E-02 | 2.55 (1.30–5.03) | 1.16E-02 | 1.77 (0.76–4.15) | 1.52E-01 |
| BMR (Quartile 3) | 586 (181) | 3.17 (2.00–5.01) | 3.48E-05 | 5.00 (2.83–8.85) | 9.09E-05 | 2.75 (1.32–5.71) | 1.48E-02 |
| BMR (Quartile 4) | 588 (342) | 16.29 (8.90–29.80) | 3.88E-09 | 27.25 (12.36–60.07) | 3.03E-06 | 11.26 (4.21–30.10) | 9.43E-04 |
| BMR (Mifflin-St Jeor, SD) | 2350 (788) | 3.74 (3.16–4.43) | 4.74E-14 | 4.84 (3.84–6.09) | 4.31E-09 | 3.74 (2.69–5.19) | 1.52E-05 |
| *P* for trend |  | <0.001 |  | <0.001 |  | 0.011 |  |
| **Female** |  |  |  |  |  |  |  |
| BMR (Quartile 1) | 668 (87) | Ref | 1 | Ref | 1 | Ref | 1 |
| BMR (Quartile 2) | 667 (117) | 2.26 (1.32–3.88) | 4.70E-03 | 3.17 (1.63–6.17) | 3.20E-03 | 2.01 (1.03–3.93) | 4.29E-02 |
| BMR (Quartile 3) | 667 (156) | 4.64 (3.37–6.39) | 2.02E-09 | 6.86 (4.13–11.39) | 7.17E-06 | 2.65 (1.46–4.79) | 7.01E-03 |
| BMR (Quartile 4) | 667 (283) | 21.26 (12.49–36.19) | 7.82E-11 | 39.11 (17.66–86.64) | 1.24E-06 | 12.88 (5.13–32.30) | 4.96E-04 |
| BMR (Mifflin-St Jeor, SD) | 2669 (643) | 3.77 (3.14–4.52) | 1.94E-13 | 4.82 (3.84–6.06) | 3.82E-09 | 3.51 (2.70–4.57) | 4.19E-06 |
| *P* for trend |  | <0.001 |  | <0.001 |  | <0.001 |  |
| *P* for interation |  |  |  |  |  | 1.28E-01 |  |
| **(2) Sensitivity analysis: BMR calculated using Mifflin-St Jeor equation and divided into tertile groups.** | | | | |  |  |  |
| **All** |  |  |  |  |  |  |  |
| BMR (Tertile 1) | 1673 (261) | Ref | 1 | Ref | 1 | Ref | 1 |
| BMR (Tertile 2) | 1673 (425) | 3.84 (2.66–5.54) | 1.80E-07 | 4.40 (2.69–7.18) | 5.14E-05 | 2.46 (1.47–4.12) | 5.31E-03 |
| BMR (Tertile 3) | 1673 (745) | 17.42 (12.15–24.98) | 1.71E-13 | 23.34 (14.56–37.41) | 3.78E-08 | 8.80 (4.59–16.84) | 1.78E-04 |
| *P* for trend |  | <0.001 |  | <0.001 |  | <0.001 |  |
| **Male** |  |  |  |  |  |  |  |
| BMR (Tertile 1) | 784 (153) | Ref | 1 | Ref | 1 | Ref | 1 |
| BMR (Tertile 2) | 783 (222) | 2.13 (1.35–3.38) | 2.43E-03 | 3.04 (1.71–5.40) | 1.36E-03 | 2.26 (1.10–4.62) | 3.14E-02 |
| BMR (Tertile 3) | 783 (413) | 12.66 (7.64–20.99) | 5.75E-10 | 19.86 (10.93–36.10) | 2.80E-07 | 10.46 (5.31–20.57) | 7.77E-05 |
| *P* for trend |  | <0.001 |  | <0.001 |  | 0.003 |  |
| **Female** |  |  |  |  |  |  |  |
| BMR (Tertile 1) | 891 (121) | Ref | 1 | Ref | 1 | Ref | 1 |
| BMR (Tertile 2) | 888 (178) | 2.36 (1.74–3.22) | 8.19E-06 | 2.70 (1.81–4.03) | 2.01E-04 | 1.41 (0.88–2.26) | 1.29E-01 |
| BMR (Tertile 3) | 890 (344) | 12.24 (7.82–19.15) | 7.72E-11 | 16.96 (8.93–32.20) | 9.83E-07 | 6.64 (3.25–13.58) | 4.21E-04 |
| *P* for trend |  | <0.001 |  | <0.001 |  | 0.004 |  |
| *P* for interation |  |  |  |  |  | 2.74E-01 |  |
| **(3) Sensitivity analysis: BMR calculated using Harris-Benedict equation and divided into quartile groups.** | | | | |  |  |  |
| **All** |  |  |  |  |  |  |  |
| BMR (Quartile 1) | 1255 (169) | Ref | 1 | Ref | 1 | Ref | 1 |
| BMR (Quartile 2) | 1255 (268) | 3.11 (2.21–4.36) | 8.90E-07 | 3.59 (2.33–5.51) | 8.62E-05 | 1.98 (1.08–3.62) | 3.34E-02 |
| BMR (Quartile 3) | 1254 (370) | 8.84 (5.89–13.28) | 4.64E-10 | 12.41 (7.15–21.56) | 2.75E-06 | 5.83 (2.90–11.74) | 1.31E-03 |
| BMR (Quartile 4) | 1255 (624) | 39.45 (26.22–59.35) | 3.61E-14 | 59.68 (35.93–99.12) | 2.05E-08 | 18.96 (9.28–38.73) | 1.30E-04 |
| BMR (Harris-Benedict, SD) | 5019 (1431) | 5.17 (4.37–6.10) | 8.00E-16 | 6.66 (5.52–8.04) | 1.78E-10 | 4.80 (3.68–6.27) | 2.33E-06 |
| *P* for trend |  | <0.001 |  | <0.001 |  | <0.001 |  |
| **Male** |  |  |  |  |  |  |  |
| BMR (Quartile 1) | 588 (102) | Ref | 1 | Ref | 1 | Ref | 1 |
| BMR (Quartile 2) | 587 (148) | 1.90 (1.16–3.12) | 1.37E-02 | 2.68 (1.42–5.06) | 6.24E-03 | 1.82 (0.80–4.17) | 1.26E-01 |
| BMR (Quartile 3) | 587 (184) | 3.50 (2.09–5.84) | 5.07E-05 | 5.59 (2.87–10.87) | 1.82E-04 | 3.16 (1.28–7.80) | 2.06E-02 |
| BMR (Quartile 4) | 588 (354) | 20.29 (10.82–38.04) | 2.08E-09 | 35.68 (15.30–83.23) | 2.78E-06 | 15.75 (5.02–49.39) | 1.05E-03 |
| BMR (Harris-Benedict, SD) | 2350 (788) | 3.98 (3.32–4.76) | 6.60E-14 | 5.12 (4.03–6.52) | 4.67E-09 | 4.07 (2.87–5.78) | 1.51E-05 |
| *P* for trend |  | <0.001 |  | <0.001 |  | 0.011 |  |
| **Female** |  |  |  |  |  |  |  |
| BMR (Quartile 1) | 668 (84) | Ref | 1 | Ref | 1 | Ref | 1 |
| BMR (Quartile 2) | 667 (104) | 1.61 (0.98–2.65) | 5.94E-02 | 2.08 (1.14–3.82) | 2.22E-02 | 1.08 (0.50–2.36) | 8.11E-01 |
| BMR (Quartile 3) | 667 (163) | 4.48 (3.16–6.37) | 1.44E-08 | 5.76 (3.59–9.24) | 8.92E-06 | 1.84 (0.87–3.88) | 9.22E-02 |
| BMR (Quartile 4) | 667 (292) | 19.94 (12.39–32.11) | 1.49E-11 | 31.87 (15.57–65.27) | 8.08E-07 | 9.13 (3.42–24.39) | 1.50E-03 |
| BMR (Harris-Benedict, SD) | 2669 (643) | 3.90 (3.26–4.66) | 7.92E-14 | 4.93 (3.95–6.14) | 2.24E-09 | 3.65 (2.84–4.71) | 2.44E-06 |
| *P* for trend |  | <0.001 |  | <0.001 |  | <0.001 |  |
| *P* for interation |  |  |  |  |  | 8.92E-02 |  |
| **(4) Sensitivity analysis: BMR calculated using Harris-Benedict equation and divided into tertile groups.** | | | | |  |  |  |
| **All** |  |  |  |  |  |  |  |
| BMR (Tertile 1) | 1673 (245) | Ref | 1 | Ref | 1 | Ref | 1 |
| BMR (Tertile 2) | 1673 (430) | 4.28 (3.10–5.92) | 6.54E-09 | 4.97 (3.20–7.73) | 1.06E-05 | 2.65 (1.65–4.26) | 2.34E-03 |
| BMR (Tertile 3) | 1673 (756) | 19.39 (13.53–27.81) | 8.26E-14 | 25.59 (16.00–40.93) | 2.74E-08 | 8.96 (4.58–17.51) | 2.03E-04 |
| *P* for trend |  | <0.001 |  | <0.001 |  | <0.001 |  |
| **Male** |  |  |  |  |  |  |  |
| BMR (Tertile 1) | 784 (144) | Ref | 1 | Ref | 1 | Ref | 1 |
| BMR (Tertile 2) | 783 (216) | 2.05 (1.38–3.06) | 1.17E-03 | 2.78 (1.68–4.58) | 9.20E-04 | 1.72 (0.97–3.07) | 6.14E-02 |
| BMR (Tertile 3) | 783 (428) | 12.01 (6.94–20.79) | 3.68E-09 | 17.05 (8.88–32.72) | 1.14E-06 | 7.94 (3.86–16.32) | 2.54E-04 |
| *P* for trend |  | <0.001 |  | 0.002 |  | 0.046 |  |
| **Female** |  |  |  |  |  |  |  |
| BMR (Tertile 1) | 890 (112) | Ref | 1 | Ref | 1 | Ref | 1 |
| BMR (Tertile 2) | 889 (178) | 2.56 (1.85–3.54) | 4.53E-06 | 2.88 (1.97–4.22) | 7.42E-05 | 1.47 (0.93–2.32) | 8.38E-02 |
| BMR (Tertile 3) | 890 (353) | 14.10 (9.43–21.08) | 3.27E-12 | 19.17 (10.62–34.61) | 2.81E-07 | 7.08 (3.74–13.41) | 1.71E-04 |
| *P* for trend |  | <0.001 |  | <0.001 |  | 0.003 |  |
| *P* for interation |  |  |  |  |  | 9.02E-02 |  |
| **(5) Sensitivity analysis: 285 dB/m as the CAP cutoff to determine NAFLD status.** | | | |  |  |  |  |
| **All** |  |  |  |  |  |  |  |
| BMR (Quartile 1) | 1258 (263) | Ref | 1 | Ref | 1 | Ref | 1 |
| BMR (Quartile 2) | 1252 (364) | 2.28 (1.65–3.15) | 2.91E-05 | 2.47 (1.73–3.52) | 2.17E-04 | 1.47 (0.90–2.43) | 1.05E-01 |
| BMR (Quartile 3) | 1254 (467) | 3.61 (2.51–5.20) | 3.27E-07 | 4.40 (2.81–6.89) | 2.45E-05 | 2.26 (1.33–3.85) | 9.30E-03 |
| BMR (Quartile 4) | 1255 (717) | 12.74 (8.58–18.92) | 9.48E-12 | 16.25 (10.09–26.16) | 1.33E-07 | 5.66 (3.08–10.41) | 4.37E-04 |
| BMR (Mifflin-St Jeor, SD) | 5019 (1811) | 3.02 (2.61–3.50) | 9.60E-14 | 3.47 (2.85–4.22) | 9.65E-09 | 2.48 (1.97–3.11) | 1.69E-05 |
| *P* for trend |  | <0.001 |  | <0.001 |  | <0.001 |  |
| **Male** |  |  |  |  |  |  |  |
| BMR (Quartile 1) | 588 (155) | Ref | 1 | Ref | 1 | Ref | 1 |
| BMR (Quartile 2) | 588 (191) | 1.88 (1.00–3.51) | 4.96E-02 | 2.52 (1.17–5.41) | 2.24E-02 | 1.80 (0.67–4.87) | 1.97E-01 |
| BMR (Quartile 3) | 586 (239) | 3.45 (2.13–5.60) | 2.75E-05 | 5.19 (2.82–9.56) | 1.29E-04 | 2.70 (1.22–5.97) | 2.19E-02 |
| BMR (Quartile 4) | 588 (389) | 15.78 (8.64–28.81) | 4.46E-09 | 25.26 (11.09–57.55) | 5.39E-06 | 10.43 (3.52–30.96) | 1.87E-03 |
| BMR (Mifflin-St Jeor, SD) | 2350 (974) | 3.58 (3.06–4.20) | 2.26E-14 | 4.52 (3.60–5.68) | 6.36E-09 | 3.38 (2.36–4.84) | 5.12E-05 |
| *P* for trend |  | <0.001 |  | <0.001 |  | 0.012 |  |
| **Female** |  |  |  |  |  |  |  |
| BMR (Quartile 1) | 668 (124) | Ref | 1 | Ref | 1 | Ref | 1 |
| BMR (Quartile 2) | 667 (166) | 2.67 (1.64–4.35) | 4.13E-04 | 3.81 (2.05–7.10) | 7.25E-04 | 2.47 (1.21–5.04) | 2.08E-02 |
| BMR (Quartile 3) | 667 (207) | 5.26 (3.68–7.51) | 3.43E-09 | 8.26 (5.15–13.26) | 1.66E-06 | 3.44 (1.84–6.43) | 2.95E-03 |
| BMR (Quartile 4) | 667 (340) | 19.81 (11.33–34.63) | 2.94E-10 | 37.64 (15.62–90.68) | 3.42E-06 | 12.14 (4.09–36.05) | 1.37E-03 |
| BMR (Mifflin-St Jeor, SD) | 2669 (837) | 3.50 (2.85–4.30) | 8.24E-12 | 4.43 (3.23–6.08) | 2.72E-07 | 3.04 (2.11–4.39) | 1.14E-04 |
| *P* for trend |  | <0.001 |  | <0.001 |  | <0.001 |  |
| *P* for interation |  |  |  |  |  | 1.46E-01 |  |

BMR groups: in main analysis, ≤1318.8, 1318.8−≤1558.8, 1558.8−≤1778.3, and >1778.3 kcal/day for total population. The cutoff values for BMR in US population were 1609.6, 1746.3, and 1919.5 kcal/day for males; and 1202.0, 1336.75, and 1503.1 kcal/day for females.

Model 1: adjusted for age, sex, as appropriate.

Model 2: further adjusted for race, marital status, education level, smoking status, physical activity level, and poverty income ratio.

Model 3: further adjusted for overweight/obesity, hypertension, diabetes, and dyslipidemia.

Ref denotes the reference group.

Abbreviations: BMR, basal metabolic rate; CAP, controlled attenuation parameter; NAFLD, non-alcoholic fatty liver disease; OR, odds ratio; CI, confidence interval.

**Table S5. Subgroup analyses for the association between basal metabolic rate categories and non-alcoholic fatty liver disease in health examination subjects.**

|  | **Males** | | |  | **Females** | | |
| --- | --- | --- | --- | --- | --- | --- | --- |
| **Characteristics** | **No. (cases)** | **OR (95% CI)** | ***P* value** |  | **No. (cases)** | **OR (95% CI)** | ***P* value** |
| **Age** |  |  |  |  |  |  |  |
| <60 |  |  |  |  |  |  |  |
| BMR (Tertile 1) | 2653 (426) | Ref |  |  | 6067 (390) | Ref |  |
| BMR (Tertile 2) | 3206 (940) | 1.61 (1.38–1.88) | 1.44E-09 |  | 6853 (505) | 1.04 (0.89–1.20) | 6.44E-01 |
| BMR (Tertile 3) | 3271 (1549) | 2.60 (2.22–3.05) | 6.33E-32 |  | 6936 (972) | 1.63 (1.41–1.89) | 3.35E-11 |
| ≥60 |  |  |  |  |  |  |  |
| BMR (Tertile 1) | 633 (123) | Ref |  |  | 939 (200) | Ref |  |
| BMR (Tertile 2) | 81 (44) | 2.11 (1.19–3.75) | 1.12E-02 |  | 137 (74) | 2.19 (1.42–3.10) | 4.52E-04 |
| BMR (Tertile 3) | 12 (8) | 4.30 (1.14–19.15) | 3.80E-02 |  | 57 (36) | 2.71 (1.45–5.20) | 2.22E-03 |
| *P* for interation |  |  | 4.62E-01 |  |  |  | **1.13E-04** |
| **Overweight/obesity** |  |  |  |  |  |  |  |
| No |  |  |  |  |  |  |  |
| BMR (Tertile 1) | 2221 (153) | Ref |  |  | 5680 (218) | Ref |  |
| BMR (Tertile 2) | 1590 (158) | 2.18 (1.62–2.93) | 2.95E-07 |  | 5358 (131) | 1.72 (1.35–2.18) | 8.16E-06 |
| BMR (Tertile 3) | 757 (74) | 2.81 (1.91–4.13) | 1.65E-07 |  | 4037 (81) | 2.35 (1.74–3.17) | 2.42E-08 |
| Yes |  |  |  |  |  |  |  |
| BMR (Tertile 1) | 1065 (396) | Ref |  |  | 1326 (372) | Ref |  |
| BMR (Tertile 2) | 1697 (826) | 1.88 (1.57–2.26) | 1.12E-11 |  | 1632 (448) | 1.44 (1.20–1.73) | 1.01E-04 |
| BMR (Tertile 3) | 2526 (1483) | 3.46 (2.82–4.27) | 2.51E-31 |  | 2956 (927) | 2.86 (2.37–3.48) | 1.29E-26 |
| *P* for interation |  |  | **2.66E-02** |  |  |  | **2.49E-07** |
| **Hypertension** |  |  |  |  |  |  |  |
| No |  |  |  |  |  |  |  |
| BMR (Tertile 1) | 2457 (312) | Ref |  |  | 5695 (306) | Ref |  |
| BMR (Tertile 2) | 2643 (662) | 2.09 (1.73–2.52) | 1.41E-14 |  | 6253 (365) | 1.53 (1.29–1.81) | 8.21E-07 |
| BMR (Tertile 3) | 2533 (1044) | 3.67 (2.96–4.55) | 5.81E-32 |  | 6252 (689) | 3.10 (2.59–3.72) | 5.33E-34 |
| Yes |  |  |  |  |  |  |  |
| BMR (Tertile 1) | 829 (237) | Ref |  |  | 1296 (282) | Ref |  |
| BMR (Tertile 2) | 640 (318) | 1.65 (1.25–2.18) | 3.70E-04 |  | 724 (214) | 1.23 (0.96–1.60) | 1.07E-01 |
| BMR (Tertile 3) | 745 (510) | 3.05 (2.18–4.27) | 9.17E-11 |  | 723 (314) | 2.25 (1.71–2.98) | 1.09E-08 |
| *P* for interation |  |  | 1.18E-01 |  |  |  | 7.25E-01 |
| **Diabetes** |  |  |  |  |  |  |  |
| No |  |  |  |  |  |  |  |
| BMR (Tertile 1) | 2977 (430) | Ref |  |  | 6714 (472) | Ref |  |
| BMR (Tertile 2) | 3112 (865) | 1.90 (1.61–2.24) | 1.33E-14 |  | 6816 (487) | 1.45 (1.26–1.68) | 4.35E-07 |
| BMR (Tertile 3) | 3130 (1425) | 3.33 (2.76–4.03) | 1.16E-35 |  | 6834 (899) | 2.87 (2.46–3.35) | 2.99E-40 |
| Yes |  |  |  |  |  |  |  |
| BMR (Tertile 1) | 309 (119) | Ref |  |  | 292 (118) | Ref |  |
| BMR (Tertile 2) | 175 (119) | 2.13 (1.31–3.50) | 2.66E-03 |  | 174 (92) | 1.20 (0.72–1.99) | 4.85E-01 |
| BMR (Tertile 3) | 153 (132) | 4.76 (2.41–9.75) | 1.33E-05 |  | 159 (109) | 2.17 (1.21–3.95) | 1.03E-02 |
| *P* for interation |  |  | 1.15E-01 |  |  |  | 9.54E-01 |
| **Dyslipidemia** |  |  |  |  |  |  |  |
| No |  |  |  |  |  |  |  |
| BMR (Tertile 1) | 2147 (226) | Ref |  |  | 5277 (267) | Ref |  |
| BMR (Tertile 2) | 1871 (331) | 1.93 (1.54–2.44) | 1.89E-08 |  | 5640 (261) | 1.39 (1.15–1.68) | 6.26E-04 |
| BMR (Tertile 3) | 1608 (527) | 3.82 (2.93–4.99) | 1.11E-22 |  | 5593 (544) | 3.10 (2.55–3.77) | 2.31E-29 |
| Yes |  |  |  |  |  |  |  |
| BMR (Tertile 1) | 1032 (310) | Ref |  |  | 1451 (310) | Ref |  |
| BMR (Tertile 2) | 1304 (633) | 1.96 (1.59–2.42) | 4.64E-10 |  | 1043 (302) | 1.47 (1.18–1.83) | 6.41E-04 |
| BMR (Tertile 3) | 1531 (988) | 3.13 (2.45–4.01) | 1.66E-19 |  | 1104 (437) | 2.24 (1.75–2.88) | 2.88E-10 |
| *P* for interation |  |  | 5.87E-01 |  |  |  | 1.04E-01 |

Full adjusted model was used.

Bolded values are *P*-values indicating a significant interaction effect.

Ref. denotes the reference group.

Abbreviations: OR, odds ratio; CI, confidence interval.

**Table S6. Subgroup analyses for the association between basal metabolic rate categories and non-alcoholic fatty liver disease in NHANES 2017-2020.**

|  | **Males** | | |  | **Females** | | |
| --- | --- | --- | --- | --- | --- | --- | --- |
| **Characteristics** | **No. (cases)** | **OR (95% CI)** | ***P* value** |  | **No. (cases)** | **OR (95% CI)** | ***P* value** |
| **Age** |  |  |  |  |  |  |  |
| <60 |  |  |  |  |  |  |  |
| BMR (Tertile 1) | 381 (59) | Ref | 1 |  | 438 (38) | Ref | 1 |
| BMR (Tertile 2) | 591 (128) | 1.54 (0.70–3.41) | 2.43E-01 |  | 651 (102) | 0.88 (0.35–2.22) | 7.64E-01 |
| BMR (Tertile 3) | 690 (347) | 7.56 (3.64–15.68) | 2.11E-04 |  | 743 (265) | 3.82 (1.55–9.43) | 9.00E-03 |
| ≥60 |  |  |  |  |  |  |  |
| BMR (Tertile 1) | 403 (94) | Ref | 1 |  | 453 (83) | Ref | 1 |
| BMR (Tertile 2) | 192 (94) | 2.95 (0.92–9.42) | 6.42E-02 |  | 237 (76) | 1.48 (0.69–3.15) | 2.70E-01 |
| BMR (Tertile 3) | 93 (66) | 4.77 (1.52–14.96) | 1.36E-02 |  | 147 (79) | 4.41 (1.95–9.98) | 3.06E-03 |
| *P* for interation |  |  | 1.30E-01 |  |  |  | 5.38E-01 |
| **Overweight/obesity** |  |  |  |  |  |  |  |
| No |  |  |  |  |  |  |  |
| BMR (Tertile 1) | 389 (30) | Ref | 1 |  | 500 (32) | Ref | 1 |
| BMR (T2-T3) | 194 (10) | 1.30 (0.25–6.68) | 7.27E-01 |  | 247 (3) | 0.18 (0.02–1.31) | 8.24E-02 |
| Yes |  |  |  |  |  |  |  |
| BMR (Tertile 1) | 395 (123) | Ref | 1 |  | 391 (89) | Ref | 1 |
| BMR (T2-T3) | 1372 (625) | 4.45 (2.25–8.77) | 7.69E-04 |  | 1531 (519) | 2.58 (1.50–4.43) | 3.26E-03 |
| *P* for interation |  |  | **1.98E-02** |  |  |  | **6.49E-11** |
| **Hypertension** |  |  |  |  |  |  |  |
| No |  |  |  |  |  |  |  |
| BMR (Tertile 1) | 430 (61) | Ref | 1 |  | 452 (42) | Ref | 1 |
| BMR (Tertile 2) | 497 (93) | 1.69 (0.66–4.30) | 2.32E-01 |  | 551 (73) | 0.92 (0.37–2.27) | 8.29E-01 |
| BMR (Tertile 3) | 485 (226) | 11.48 (4.62–28.51) | 2.64E-04 |  | 524 (165) | 6.34 (2.11–19.03) | 4.69E-03 |
| Yes |  |  |  |  |  |  |  |
| BMR (Tertile 1) | 306 (81) | Ref | 1 |  | 361 (68) | Ref | 1 |
| BMR (Tertile 2) | 239 (119) | 3.30 (1.25–8.69) | 2.16E-02 |  | 273 (89) | 1.93 (1.14–3.26) | 2.07E-02 |
| BMR (Tertile 3) | 269 (173) | 8.33 (3.26–21.23) | 8.02E-04 |  | 302 (164) | 5.90 (2.42–14.39) | 1.78E-03 |
| *P* for interation |  |  | **3.71E-02** |  |  |  | 1.79E-01 |
| **Diabetes** |  |  |  |  |  |  |  |
| No |  |  |  |  |  |  |  |
| BMR (Tertile 1) | 600 (100) | Ref | 1 |  | 722 (65) | Ref | 1 |
| BMR (Tertile 2) | 625 (141) | 2.04 (0.87–4.80) | 8.99E-02 |  | 746 (109) | 1.05 (0.55–1.99) | 8.74E-01 |
| BMR (Tertile 3) | 612 (295) | 9.60 (4.26–21.62) | 2.04E-04 |  | 695 (216) | 5.56 (2.38–12.99) | 1.62E-03 |
| Yes |  |  |  |  |  |  |  |
| BMR (Tertile 1) | 150 (49) | Ref | 1 |  | 142 (53) | Ref | 1 |
| BMR (Tertile 2) | 123 (72) | 3.44 (1.10–10.72) | 3.70E-02 |  | 119 (63) | 5.56 (1.46–21.23) | 1.84E-02 |
| BMR (Tertile 3) | 130 (99) | 22.39 (4.30–116.54) | 2.46E-03 |  | 162 (120) | 17.76 (4.57–68.98) | 1.21E-03 |
| *P* for interation |  |  | 1.30E-01 |  |  |  | 8.67E-02 |
| **Dyslipidemia** |  |  |  |  |  |  |  |
| No |  |  |  |  |  |  |  |
| BMR (Tertile 1) | 102 (37) | Ref | 1 |  | 28 (8) | Ref | 1 |
| BMR (Tertile 2) | 119 (55) | 7.08 (1.68–29.77) | 1.37E-02 |  | 49 (19) | 0.88 (0.06–13.40) | 9.12E-01 |
| BMR (Tertile 3) | 215 (131) | 18.50 (3.48–98.47) | 3.82E-03 |  | 103 (54) | 2.83 (0.19–41.42) | 3.90E-01 |
| Yes |  |  |  |  |  |  |  |
| BMR (Tertile 1) | 618 (110) | Ref | 1 |  | 812 (105) | Ref | 1 |
| BMR (Tertile 2) | 611 (156) | 2.05 (0.97–4.34) | 5.73E-02 |  | 797 (145) | 1.47 (0.85–2.52) | 1.42E-01 |
| BMR (Tertile 3) | 508 (252) | 10.35 (4.91–21.79) | 8.93E-05 |  | 729 (271) | 7.39 (3.55–15.35) | 2.32E-04 |
| *P* for interation |  |  | 5.30E-01 |  |  |  | 4.68E-01 |

Full adjusted model was used.

Bolded values are *P*-values indicating a significant interaction effect.

Ref denotes the reference group.

Abbreviations: OR, odds ratio; CI, confidence interval.

**Table S7. Instrumental variables used for the association between basal metabolic rate and non-alcoholic fatty liver disease in the MR analysis.**

| **Exposure** | **SNP** | **Effect allele** | **Other allele** | **Beta** | **SE** | **EAF** | ***P* value** | **R2** | **F value** | **RadialMR** | |
| --- | --- | --- | --- | --- | --- | --- | --- | --- | --- | --- | --- |
| **Q statistic** | ***P* value** |
| Basal metabolic rate || id:ebi-a-GCST90029025 | rs10767659 | T | G | -0.0184 | 0.0013 | 0.67 | 3.50E-47 | 1.68E-04 | 89.7306 | 5.4142 | 0.0200 |
| Basal metabolic rate || id:ebi-a-GCST90029025 | rs10775348 | G | A | 0.0123 | 0.0013 | 0.70 | 5.80E-20 | 6.66E-05 | 35.5942 | 4.3924 | 0.0361 |
| Basal metabolic rate || id:ebi-a-GCST90029025 | rs10925635 | C | A | 0.0086 | 0.0013 | 0.64 | 1.20E-11 | 4.04E-05 | 21.5875 | 9.4992 | 0.0021 |
| Basal metabolic rate || id:ebi-a-GCST90029025 | rs10958478 | T | A | 0.0180 | 0.0015 | 0.22 | 8.60E-36 | 1.00E-04 | 53.6226 | 3.9501 | 0.0469 |
| Basal metabolic rate || id:ebi-a-GCST90029025 | rs10991925 | C | T | -0.0119 | 0.0014 | 0.28 | 1.40E-17 | 5.75E-05 | 30.7035 | 4.6171 | 0.0317 |
| Basal metabolic rate || id:ebi-a-GCST90029025 | rs11498196 | T | C | 0.0079 | 0.0012 | 0.41 | 2.10E-10 | 3.70E-05 | 19.7517 | 5.7965 | 0.0161 |
| Basal metabolic rate || id:ebi-a-GCST90029025 | rs12188627 | G | A | -0.0108 | 0.0012 | 0.49 | 4.20E-19 | 7.40E-05 | 39.5091 | 4.6374 | 0.0313 |
| Basal metabolic rate || id:ebi-a-GCST90029025 | rs12588830 | A | G | 0.0100 | 0.0016 | 0.18 | 1.40E-10 | 2.26E-05 | 12.0743 | 6.2366 | 0.0125 |
| Basal metabolic rate || id:ebi-a-GCST90029025 | rs12738523 | T | A | -0.0079 | 0.0013 | 0.31 | 4.20E-10 | 2.95E-05 | 15.7329 | 5.1448 | 0.0233 |
| Basal metabolic rate || id:ebi-a-GCST90029025 | rs13271368 | T | C | -0.0149 | 0.0014 | 0.24 | 3.10E-25 | 7.18E-05 | 38.3349 | 4.3039 | 0.0380 |
| Basal metabolic rate || id:ebi-a-GCST90029025 | rs1539110 | T | C | 0.0082 | 0.0014 | 0.24 | 1.90E-09 | 2.30E-05 | 12.2979 | 3.9650 | 0.0465 |
| Basal metabolic rate || id:ebi-a-GCST90029025 | rs2065999 | C | T | -0.0071 | 0.0013 | 0.38 | 5.40E-09 | 2.83E-05 | 15.1168 | 8.8881 | 0.0029 |
| Basal metabolic rate || id:ebi-a-GCST90029025 | rs2287214 | G | A | 0.0067 | 0.0012 | 0.40 | 3.80E-08 | 2.60E-05 | 13.9097 | 6.2700 | 0.0123 |
| Basal metabolic rate || id:ebi-a-GCST90029025 | rs2320731 | T | C | 0.0083 | 0.0013 | 0.32 | 9.90E-11 | 3.28E-05 | 17.5420 | 7.1719 | 0.0074 |
| Basal metabolic rate || id:ebi-a-GCST90029025 | rs2627692 | T | C | -0.0099 | 0.0012 | 0.51 | 6.10E-17 | 6.15E-05 | 32.8643 | 3.8868 | 0.0487 |
| Basal metabolic rate || id:ebi-a-GCST90029025 | rs2744956 | C | T | 0.0391 | 0.0018 | 0.14 | 4.80E-112 | 2.23E-04 | 119.2969 | 6.8276 | 0.0090 |
| Basal metabolic rate || id:ebi-a-GCST90029025 | rs2900208 | A | C | 0.0132 | 0.0013 | 0.35 | 4.60E-26 | 9.29E-05 | 49.6413 | 5.4417 | 0.0197 |
| Basal metabolic rate || id:ebi-a-GCST90029025 | rs4235838 | A | G | -0.0083 | 0.0013 | 0.33 | 2.20E-10 | 3.39E-05 | 18.1225 | 6.0739 | 0.0137 |
| Basal metabolic rate || id:ebi-a-GCST90029025 | rs4566595 | A | C | 0.0073 | 0.0013 | 0.62 | 4.30E-09 | 2.92E-05 | 15.5724 | 6.7017 | 0.0096 |
| Basal metabolic rate || id:ebi-a-GCST90029025 | rs4680 | A | G | 0.0080 | 0.0012 | 0.52 | 4.20E-11 | 4.00E-05 | 21.3602 | 7.7750 | 0.0053 |
| Basal metabolic rate || id:ebi-a-GCST90029025 | rs55758152 | A | G | 0.0084 | 0.0013 | 0.33 | 1.80E-10 | 3.42E-05 | 18.2450 | 4.1468 | 0.0417 |
| Basal metabolic rate || id:ebi-a-GCST90029025 | rs56094641 | G | A | 0.0412 | 0.0012 | 0.40 | 1.00E-200 | 9.97E-04 | 533.1847 | 9.3407 | 0.0022 |
| Basal metabolic rate || id:ebi-a-GCST90029025 | rs6096886 | G | A | -0.0189 | 0.0016 | 0.19 | 2.50E-33 | 8.56E-05 | 45.7171 | 4.5251 | 0.0334 |
| Basal metabolic rate || id:ebi-a-GCST90029025 | rs61855849 | A | G | -0.0101 | 0.0014 | 0.26 | 2.30E-12 | 3.75E-05 | 20.0342 | 7.8664 | 0.0050 |
| Basal metabolic rate || id:ebi-a-GCST90029025 | rs6905095 | A | C | -0.0082 | 0.0012 | 0.44 | 7.70E-12 | 4.10E-05 | 21.9048 | 4.8675 | 0.0274 |
| Basal metabolic rate || id:ebi-a-GCST90029025 | rs7426945 | G | A | 0.0075 | 0.0012 | 0.55 | 2.40E-09 | 3.53E-05 | 18.8477 | 3.9294 | 0.0474 |
| Basal metabolic rate || id:ebi-a-GCST90029025 | rs751894 | T | C | 0.0092 | 0.0015 | 0.21 | 2.00E-10 | 2.25E-05 | 11.9929 | 3.8481 | 0.0498 |
| Basal metabolic rate || id:ebi-a-GCST90029025 | rs7740107 | A | T | -0.0279 | 0.0014 | 0.74 | 1.80E-95 | 2.99E-04 | 159.7155 | 6.6906 | 0.0097 |
| Basal metabolic rate || id:ebi-a-GCST90029025 | rs8002779 | A | G | -0.0072 | 0.0012 | 0.60 | 5.40E-09 | 3.04E-05 | 16.2315 | 5.3712 | 0.0205 |
| Basal metabolic rate || id:ebi-a-GCST90029025 | rs887912 | C | T | -0.0111 | 0.0013 | 0.70 | 1.70E-17 | 5.51E-05 | 29.4063 | 4.7884 | 0.0287 |
| Basal metabolic rate || id:ebi-a-GCST90029025 | rs9352808 | T | G | -0.0115 | 0.0012 | 0.45 | 1.10E-20 | 8.27E-05 | 44.1426 | 5.1705 | 0.0230 |
| Basal metabolic rate || id:ebi-a-GCST90029025 | rs9388498 | T | G | 0.0176 | 0.0016 | 0.19 | 5.60E-28 | 6.84E-05 | 36.5392 | 4.2708 | 0.0388 |
| Basal metabolic rate || id:ebi-a-GCST90029025 | rs9960619 | T | C | 0.0090 | 0.0013 | 0.34 | 6.10E-13 | 4.10E-05 | 21.9189 | 12.6050 | 0.0004 |
| Basal metabolic rate || id:ebi-a-GCST90029025 | rs10020631 | A | G | -0.0085 | 0.0014 | 0.25 | 2.90E-09 | 2.50E-05 | 13.3756 |  |  |
| Basal metabolic rate || id:ebi-a-GCST90029025 | rs1008158 | G | A | 0.0089 | 0.0013 | 0.34 | 9.80E-13 | 4.05E-05 | 21.6343 |  |  |
| Basal metabolic rate || id:ebi-a-GCST90029025 | rs10124197 | C | T | -0.0071 | 0.0013 | 0.30 | 4.00E-08 | 2.26E-05 | 12.0852 |  |  |
| Basal metabolic rate || id:ebi-a-GCST90029025 | rs10145154 | T | C | 0.0172 | 0.0015 | 0.22 | 1.60E-32 | 8.82E-05 | 47.0853 |  |  |
| Basal metabolic rate || id:ebi-a-GCST90029025 | rs10172196 | A | G | 0.0116 | 0.0013 | 0.31 | 2.10E-18 | 6.23E-05 | 33.2764 |  |  |
| Basal metabolic rate || id:ebi-a-GCST90029025 | rs10202845 | G | A | -0.0165 | 0.0019 | 0.11 | 9.30E-17 | 2.78E-05 | 14.8415 |  |  |
| Basal metabolic rate || id:ebi-a-GCST90029025 | rs10215645 | C | T | 0.0079 | 0.0012 | 0.45 | 7.70E-11 | 3.92E-05 | 20.9342 |  |  |
| Basal metabolic rate || id:ebi-a-GCST90029025 | rs1024889 | G | A | 0.0079 | 0.0013 | 0.33 | 1.30E-09 | 3.13E-05 | 16.6932 |  |  |
| Basal metabolic rate || id:ebi-a-GCST90029025 | rs10282707 | T | C | 0.0075 | 0.0012 | 0.40 | 1.10E-08 | 3.30E-05 | 17.6050 |  |  |
| Basal metabolic rate || id:ebi-a-GCST90029025 | rs1035607 | C | A | 0.0090 | 0.0014 | 0.24 | 3.40E-10 | 2.75E-05 | 14.6629 |  |  |
| Basal metabolic rate || id:ebi-a-GCST90029025 | rs1037702 | A | G | -0.0081 | 0.0013 | 0.62 | 2.40E-10 | 3.65E-05 | 19.5106 |  |  |
| Basal metabolic rate || id:ebi-a-GCST90029025 | rs10404726 | T | C | -0.0095 | 0.0012 | 0.47 | 4.50E-16 | 5.66E-05 | 30.2048 |  |  |
| Basal metabolic rate || id:ebi-a-GCST90029025 | rs1045475 | G | A | 0.0200 | 0.0016 | 0.82 | 1.40E-35 | 8.64E-05 | 46.1709 |  |  |
| Basal metabolic rate || id:ebi-a-GCST90029025 | rs10457469 | A | G | 0.0142 | 0.0012 | 0.52 | 3.60E-32 | 1.28E-04 | 68.1855 |  |  |
| Basal metabolic rate || id:ebi-a-GCST90029025 | rs1048932 | A | C | -0.0071 | 0.0012 | 0.41 | 3.70E-08 | 3.02E-05 | 16.1042 |  |  |
| Basal metabolic rate || id:ebi-a-GCST90029025 | rs1060967 | C | G | -0.0082 | 0.0013 | 0.37 | 2.30E-11 | 3.65E-05 | 19.4892 |  |  |
| Basal metabolic rate || id:ebi-a-GCST90029025 | rs1064213 | A | G | 0.0100 | 0.0012 | 0.48 | 3.90E-17 | 6.37E-05 | 34.0084 |  |  |
| Basal metabolic rate || id:ebi-a-GCST90029025 | rs10735418 | C | T | -0.0102 | 0.0013 | 0.37 | 2.50E-16 | 5.86E-05 | 31.2871 |  |  |
| Basal metabolic rate || id:ebi-a-GCST90029025 | rs10738451 | C | T | 0.0076 | 0.0014 | 0.28 | 6.90E-09 | 2.41E-05 | 12.8515 |  |  |
| Basal metabolic rate || id:ebi-a-GCST90029025 | rs1573891 | C | G | -0.0202 | 0.0017 | 0.16 | 2.80E-33 | 7.14E-05 | 38.1294 |  |  |
| Basal metabolic rate || id:ebi-a-GCST90029025 | rs10769939 | T | C | -0.0091 | 0.0013 | 0.35 | 7.20E-13 | 4.28E-05 | 22.8618 |  |  |
| Basal metabolic rate || id:ebi-a-GCST90029025 | rs10773172 | A | G | 0.0173 | 0.0014 | 0.74 | 1.60E-36 | 1.12E-04 | 59.6093 |  |  |
| Basal metabolic rate || id:ebi-a-GCST90029025 | rs1618407 | C | T | 0.0118 | 0.0016 | 0.81 | 2.90E-15 | 3.28E-05 | 17.5153 |  |  |
| Basal metabolic rate || id:ebi-a-GCST90029025 | rs10775406 | G | A | -0.0109 | 0.0014 | 0.76 | 1.40E-14 | 3.99E-05 | 21.2886 |  |  |
| Basal metabolic rate || id:ebi-a-GCST90029025 | rs10777860 | A | G | -0.0094 | 0.0012 | 0.53 | 2.00E-15 | 5.52E-05 | 29.4921 |  |  |
| Basal metabolic rate || id:ebi-a-GCST90029025 | rs10803955 | G | A | -0.0108 | 0.0012 | 0.51 | 3.20E-19 | 7.48E-05 | 39.9243 |  |  |
| Basal metabolic rate || id:ebi-a-GCST90029025 | rs10835368 | C | T | 0.0091 | 0.0013 | 0.63 | 1.70E-13 | 4.59E-05 | 24.5098 |  |  |
| Basal metabolic rate || id:ebi-a-GCST90029025 | rs10838703 | G | C | -0.0092 | 0.0013 | 0.31 | 3.30E-13 | 3.88E-05 | 20.7479 |  |  |
| Basal metabolic rate || id:ebi-a-GCST90029025 | rs10870597 | G | A | -0.0105 | 0.0014 | 0.24 | 7.50E-13 | 3.57E-05 | 19.0766 |  |  |
| Basal metabolic rate || id:ebi-a-GCST90029025 | rs10878984 | T | C | 0.0116 | 0.0013 | 0.34 | 2.70E-20 | 6.91E-05 | 36.9089 |  |  |
| Basal metabolic rate || id:ebi-a-GCST90029025 | rs17246129 | A | G | 0.0104 | 0.0013 | 0.30 | 2.10E-15 | 4.98E-05 | 26.6031 |  |  |
| Basal metabolic rate || id:ebi-a-GCST90029025 | rs17363646 | G | A | 0.0130 | 0.0018 | 0.14 | 4.00E-14 | 2.40E-05 | 12.7926 |  |  |
| Basal metabolic rate || id:ebi-a-GCST90029025 | rs10973198 | C | T | -0.0078 | 0.0012 | 0.54 | 9.70E-11 | 3.77E-05 | 20.1209 |  |  |
| Basal metabolic rate || id:ebi-a-GCST90029025 | rs10985962 | T | C | -0.0072 | 0.0013 | 0.63 | 7.00E-09 | 2.79E-05 | 14.9187 |  |  |
| Basal metabolic rate || id:ebi-a-GCST90029025 | rs17668356 | G | C | -0.0139 | 0.0017 | 0.15 | 5.10E-16 | 3.08E-05 | 16.4294 |  |  |
| Basal metabolic rate || id:ebi-a-GCST90029025 | rs10995319 | C | T | -0.0087 | 0.0014 | 0.23 | 1.60E-09 | 2.43E-05 | 12.9869 |  |  |
| Basal metabolic rate || id:ebi-a-GCST90029025 | rs11013045 | G | T | -0.0093 | 0.0012 | 0.61 | 1.50E-13 | 4.99E-05 | 26.6281 |  |  |
| Basal metabolic rate || id:ebi-a-GCST90029025 | rs11014285 | A | G | 0.0180 | 0.0017 | 0.17 | 4.40E-27 | 6.10E-05 | 32.5540 |  |  |
| Basal metabolic rate || id:ebi-a-GCST90029025 | rs11031105 | G | C | 0.0119 | 0.0013 | 0.32 | 6.40E-21 | 6.85E-05 | 36.6020 |  |  |
| Basal metabolic rate || id:ebi-a-GCST90029025 | rs111365325 | T | C | -0.0133 | 0.0014 | 0.23 | 2.20E-20 | 5.68E-05 | 30.3396 |  |  |
| Basal metabolic rate || id:ebi-a-GCST90029025 | rs11142705 | A | G | -0.0080 | 0.0012 | 0.41 | 1.20E-10 | 3.74E-05 | 19.9996 |  |  |
| Basal metabolic rate || id:ebi-a-GCST90029025 | rs11160601 | T | C | 0.0170 | 0.0021 | 0.09 | 3.90E-16 | 2.01E-05 | 10.7195 |  |  |
| Basal metabolic rate || id:ebi-a-GCST90029025 | rs111640872 | C | G | 0.0163 | 0.0013 | 0.33 | 2.10E-36 | 1.31E-04 | 69.7250 |  |  |
| Basal metabolic rate || id:ebi-a-GCST90029025 | rs11196169 | G | A | -0.0099 | 0.0012 | 0.53 | 8.50E-15 | 5.86E-05 | 31.2879 |  |  |
| Basal metabolic rate || id:ebi-a-GCST90029025 | rs11205354 | A | C | -0.0073 | 0.0012 | 0.44 | 1.70E-09 | 3.32E-05 | 17.7246 |  |  |
| Basal metabolic rate || id:ebi-a-GCST90029025 | rs1121 | A | G | -0.0116 | 0.0013 | 0.30 | 3.20E-18 | 5.88E-05 | 31.4159 |  |  |
| Basal metabolic rate || id:ebi-a-GCST90029025 | rs1122848 | G | A | -0.0072 | 0.0013 | 0.32 | 1.70E-08 | 2.51E-05 | 13.3907 |  |  |
| Basal metabolic rate || id:ebi-a-GCST90029025 | rs11240565 | T | C | 0.0118 | 0.0012 | 0.40 | 6.50E-22 | 8.26E-05 | 44.1311 |  |  |
| Basal metabolic rate || id:ebi-a-GCST90029025 | rs11243202 | C | T | 0.0166 | 0.0012 | 0.49 | 5.10E-42 | 1.74E-04 | 93.1852 |  |  |
| Basal metabolic rate || id:ebi-a-GCST90029025 | rs11245450 | A | G | -0.0100 | 0.0012 | 0.42 | 2.80E-16 | 5.95E-05 | 31.7649 |  |  |
| Basal metabolic rate || id:ebi-a-GCST90029025 | rs11263862 | T | C | 0.0079 | 0.0013 | 0.69 | 3.40E-09 | 2.92E-05 | 15.6159 |  |  |
| Basal metabolic rate || id:ebi-a-GCST90029025 | rs112685832 | A | C | 0.0142 | 0.0019 | 0.12 | 1.00E-13 | 2.10E-05 | 11.2212 |  |  |
| Basal metabolic rate || id:ebi-a-GCST90029025 | rs112957890 | G | A | 0.0095 | 0.0014 | 0.27 | 8.00E-12 | 3.37E-05 | 18.0091 |  |  |
| Basal metabolic rate || id:ebi-a-GCST90029025 | rs114177791 | T | G | 0.0113 | 0.0015 | 0.21 | 1.70E-14 | 3.64E-05 | 19.4535 |  |  |
| Basal metabolic rate || id:ebi-a-GCST90029025 | rs2102278 | G | A | 0.0113 | 0.0013 | 0.32 | 9.80E-20 | 6.20E-05 | 33.0914 |  |  |
| Basal metabolic rate || id:ebi-a-GCST90029025 | rs115179432 | G | A | -0.0218 | 0.0023 | 0.07 | 3.40E-20 | 2.15E-05 | 11.4690 |  |  |
| Basal metabolic rate || id:ebi-a-GCST90029025 | rs11524516 | A | G | -0.0102 | 0.0013 | 0.29 | 2.20E-15 | 4.48E-05 | 23.9471 |  |  |
| Basal metabolic rate || id:ebi-a-GCST90029025 | rs11593107 | T | C | -0.0079 | 0.0012 | 0.53 | 5.60E-10 | 3.91E-05 | 20.9000 |  |  |
| Basal metabolic rate || id:ebi-a-GCST90029025 | rs11663903 | A | G | 0.0072 | 0.0012 | 0.43 | 1.90E-09 | 3.09E-05 | 16.4856 |  |  |
| Basal metabolic rate || id:ebi-a-GCST90029025 | rs1167309 | T | C | -0.0105 | 0.0013 | 0.68 | 2.00E-16 | 5.35E-05 | 28.5558 |  |  |
| Basal metabolic rate || id:ebi-a-GCST90029025 | rs11681299 | T | C | 0.0098 | 0.0013 | 0.29 | 1.50E-13 | 4.15E-05 | 22.1823 |  |  |
| Basal metabolic rate || id:ebi-a-GCST90029025 | rs11689727 | A | C | -0.0109 | 0.0013 | 0.33 | 2.50E-17 | 6.02E-05 | 32.1414 |  |  |
| Basal metabolic rate || id:ebi-a-GCST90029025 | rs11709402 | G | A | 0.0123 | 0.0014 | 0.28 | 2.60E-20 | 6.17E-05 | 32.9712 |  |  |
| Basal metabolic rate || id:ebi-a-GCST90029025 | rs11712872 | A | G | 0.0171 | 0.0019 | 0.12 | 2.50E-19 | 3.12E-05 | 16.6696 |  |  |
| Basal metabolic rate || id:ebi-a-GCST90029025 | rs11739036 | A | G | -0.0117 | 0.0013 | 0.34 | 3.50E-18 | 6.66E-05 | 35.5897 |  |  |
| Basal metabolic rate || id:ebi-a-GCST90029025 | rs1176314 | G | T | -0.0070 | 0.0012 | 0.55 | 5.60E-09 | 3.02E-05 | 16.1385 |  |  |
| Basal metabolic rate || id:ebi-a-GCST90029025 | rs11771928 | A | G | -0.0075 | 0.0013 | 0.29 | 4.10E-09 | 2.45E-05 | 13.1058 |  |  |
| Basal metabolic rate || id:ebi-a-GCST90029025 | rs11773731 | G | A | 0.0117 | 0.0013 | 0.37 | 2.30E-20 | 7.44E-05 | 39.7470 |  |  |
| Basal metabolic rate || id:ebi-a-GCST90029025 | rs11779459 | T | C | 0.0079 | 0.0013 | 0.35 | 3.20E-10 | 3.29E-05 | 17.5669 |  |  |
| Basal metabolic rate || id:ebi-a-GCST90029025 | rs11784985 | T | A | -0.0083 | 0.0012 | 0.41 | 3.60E-12 | 4.09E-05 | 21.8401 |  |  |
| Basal metabolic rate || id:ebi-a-GCST90029025 | rs11785562 | A | G | 0.0118 | 0.0015 | 0.20 | 6.30E-14 | 3.53E-05 | 18.8548 |  |  |
| Basal metabolic rate || id:ebi-a-GCST90029025 | rs11794152 | G | A | 0.0113 | 0.0012 | 0.42 | 2.80E-20 | 7.62E-05 | 40.6873 |  |  |
| Basal metabolic rate || id:ebi-a-GCST90029025 | rs11880992 | A | G | 0.0126 | 0.0012 | 0.41 | 5.70E-25 | 9.26E-05 | 49.4779 |  |  |
| Basal metabolic rate || id:ebi-a-GCST90029025 | rs11925245 | G | A | -0.0107 | 0.0016 | 0.18 | 8.00E-12 | 2.56E-05 | 13.6565 |  |  |
| Basal metabolic rate || id:ebi-a-GCST90029025 | rs11982736 | A | G | -0.0108 | 0.0017 | 0.15 | 1.90E-10 | 2.01E-05 | 10.7128 |  |  |
| Basal metabolic rate || id:ebi-a-GCST90029025 | rs11997525 | A | T | 0.0136 | 0.0016 | 0.17 | 1.90E-16 | 3.58E-05 | 19.1196 |  |  |
| Basal metabolic rate || id:ebi-a-GCST90029025 | rs12031493 | G | A | -0.0083 | 0.0012 | 0.48 | 2.90E-12 | 4.36E-05 | 23.2664 |  |  |
| Basal metabolic rate || id:ebi-a-GCST90029025 | rs12041740 | A | G | -0.0156 | 0.0014 | 0.74 | 1.70E-29 | 9.21E-05 | 49.1868 |  |  |
| Basal metabolic rate || id:ebi-a-GCST90029025 | rs12072845 | A | G | -0.0143 | 0.0012 | 0.39 | 3.50E-31 | 1.19E-04 | 63.5432 |  |  |
| Basal metabolic rate || id:ebi-a-GCST90029025 | rs12091972 | C | A | 0.0222 | 0.0021 | 0.09 | 3.30E-26 | 3.39E-05 | 18.1131 |  |  |
| Basal metabolic rate || id:ebi-a-GCST90029025 | rs12099669 | A | G | 0.0161 | 0.0013 | 0.70 | 9.80E-35 | 1.17E-04 | 62.7130 |  |  |
| Basal metabolic rate || id:ebi-a-GCST90029025 | rs12140153 | T | G | -0.0216 | 0.0021 | 0.09 | 2.40E-25 | 3.34E-05 | 17.8275 |  |  |
| Basal metabolic rate || id:ebi-a-GCST90029025 | rs12148418 | A | G | -0.0104 | 0.0012 | 0.51 | 3.60E-18 | 6.79E-05 | 36.2440 |  |  |
| Basal metabolic rate || id:ebi-a-GCST90029025 | rs1218822 | A | G | 0.0105 | 0.0013 | 0.66 | 1.10E-16 | 5.54E-05 | 29.5931 |  |  |
| Basal metabolic rate || id:ebi-a-GCST90029025 | rs251388 | T | C | -0.0095 | 0.0012 | 0.51 | 6.80E-15 | 5.75E-05 | 30.7331 |  |  |
| Basal metabolic rate || id:ebi-a-GCST90029025 | rs12213070 | A | G | -0.0093 | 0.0013 | 0.35 | 3.80E-13 | 4.52E-05 | 24.1659 |  |  |
| Basal metabolic rate || id:ebi-a-GCST90029025 | rs12216497 | T | C | -0.0100 | 0.0012 | 0.56 | 1.70E-16 | 6.19E-05 | 33.0456 |  |  |
| Basal metabolic rate || id:ebi-a-GCST90029025 | rs12227680 | A | T | 0.0076 | 0.0014 | 0.27 | 3.90E-08 | 2.24E-05 | 11.9842 |  |  |
| Basal metabolic rate || id:ebi-a-GCST90029025 | rs12254441 | T | C | -0.0075 | 0.0013 | 0.37 | 3.40E-09 | 2.94E-05 | 15.6957 |  |  |
| Basal metabolic rate || id:ebi-a-GCST90029025 | rs12375196 | A | C | 0.0112 | 0.0012 | 0.42 | 2.10E-19 | 7.45E-05 | 39.7796 |  |  |
| Basal metabolic rate || id:ebi-a-GCST90029025 | rs12427047 | T | C | -0.0110 | 0.0014 | 0.24 | 3.90E-14 | 4.18E-05 | 22.3222 |  |  |
| Basal metabolic rate || id:ebi-a-GCST90029025 | rs12443906 | T | C | -0.0139 | 0.0014 | 0.72 | 1.50E-24 | 7.73E-05 | 41.2794 |  |  |
| Basal metabolic rate || id:ebi-a-GCST90029025 | rs12467963 | T | A | -0.0082 | 0.0012 | 0.40 | 5.10E-12 | 3.96E-05 | 21.1627 |  |  |
| Basal metabolic rate || id:ebi-a-GCST90029025 | rs1250569 | C | T | 0.0069 | 0.0012 | 0.44 | 4.00E-09 | 2.86E-05 | 15.2983 |  |  |
| Basal metabolic rate || id:ebi-a-GCST90029025 | rs12520308 | C | T | -0.0091 | 0.0013 | 0.68 | 9.80E-13 | 4.01E-05 | 21.4253 |  |  |
| Basal metabolic rate || id:ebi-a-GCST90029025 | rs12520894 | C | T | 0.0067 | 0.0012 | 0.45 | 9.10E-09 | 2.78E-05 | 14.8255 |  |  |
| Basal metabolic rate || id:ebi-a-GCST90029025 | rs12533548 | G | A | 0.0073 | 0.0013 | 0.65 | 8.10E-09 | 2.76E-05 | 14.7479 |  |  |
| Basal metabolic rate || id:ebi-a-GCST90029025 | rs12543207 | T | C | -0.0098 | 0.0014 | 0.23 | 2.10E-12 | 3.15E-05 | 16.8002 |  |  |
| Basal metabolic rate || id:ebi-a-GCST90029025 | rs2736429 | G | A | 0.0117 | 0.0017 | 0.38 | 6.00E-12 | 4.11E-05 | 21.9337 |  |  |
| Basal metabolic rate || id:ebi-a-GCST90029025 | rs12657771 | A | G | -0.0118 | 0.0012 | 0.44 | 6.80E-22 | 8.48E-05 | 45.2702 |  |  |
| Basal metabolic rate || id:ebi-a-GCST90029025 | rs12679359 | T | G | -0.0122 | 0.0018 | 0.14 | 2.70E-12 | 2.11E-05 | 11.2672 |  |  |
| Basal metabolic rate || id:ebi-a-GCST90029025 | rs12713004 | G | A | 0.0163 | 0.0014 | 0.73 | 6.10E-34 | 1.08E-04 | 57.6112 |  |  |
| Basal metabolic rate || id:ebi-a-GCST90029025 | rs12729817 | G | A | -0.0087 | 0.0012 | 0.47 | 1.80E-12 | 4.85E-05 | 25.8929 |  |  |
| Basal metabolic rate || id:ebi-a-GCST90029025 | rs12731187 | T | C | -0.0081 | 0.0013 | 0.36 | 1.40E-10 | 3.45E-05 | 18.4512 |  |  |
| Basal metabolic rate || id:ebi-a-GCST90029025 | rs284662 | C | T | -0.0098 | 0.0013 | 0.62 | 1.60E-14 | 5.40E-05 | 28.8626 |  |  |
| Basal metabolic rate || id:ebi-a-GCST90029025 | rs12784071 | T | C | 0.0090 | 0.0014 | 0.23 | 1.40E-09 | 2.56E-05 | 13.6774 |  |  |
| Basal metabolic rate || id:ebi-a-GCST90029025 | rs12881375 | A | C | -0.0071 | 0.0013 | 0.71 | 3.10E-08 | 2.12E-05 | 11.2982 |  |  |
| Basal metabolic rate || id:ebi-a-GCST90029025 | rs12888955 | A | G | -0.0094 | 0.0013 | 0.66 | 2.50E-14 | 4.51E-05 | 24.0798 |  |  |
| Basal metabolic rate || id:ebi-a-GCST90029025 | rs12900800 | A | G | -0.0090 | 0.0014 | 0.75 | 8.10E-11 | 2.79E-05 | 14.8921 |  |  |
| Basal metabolic rate || id:ebi-a-GCST90029025 | rs12907384 | C | T | -0.0106 | 0.0012 | 0.53 | 4.50E-19 | 7.05E-05 | 37.6380 |  |  |
| Basal metabolic rate || id:ebi-a-GCST90029025 | rs12908182 | T | C | -0.0103 | 0.0012 | 0.46 | 3.40E-16 | 6.58E-05 | 35.1372 |  |  |
| Basal metabolic rate || id:ebi-a-GCST90029025 | rs12959994 | A | G | -0.0115 | 0.0015 | 0.22 | 1.80E-15 | 4.03E-05 | 21.4978 |  |  |
| Basal metabolic rate || id:ebi-a-GCST90029025 | rs12981554 | G | A | -0.0089 | 0.0012 | 0.54 | 8.20E-13 | 4.85E-05 | 25.9002 |  |  |
| Basal metabolic rate || id:ebi-a-GCST90029025 | rs13007086 | T | A | 0.0362 | 0.0016 | 0.83 | 7.80E-116 | 2.74E-04 | 146.3158 |  |  |
| Basal metabolic rate || id:ebi-a-GCST90029025 | rs13077747 | C | T | 0.0131 | 0.0012 | 0.52 | 4.60E-27 | 1.09E-04 | 58.2501 |  |  |
| Basal metabolic rate || id:ebi-a-GCST90029025 | rs13099930 | G | A | -0.0086 | 0.0013 | 0.66 | 1.70E-11 | 3.79E-05 | 20.2304 |  |  |
| Basal metabolic rate || id:ebi-a-GCST90029025 | rs13125807 | T | C | 0.0114 | 0.0017 | 0.14 | 1.50E-11 | 1.94E-05 | 10.3661 |  |  |
| Basal metabolic rate || id:ebi-a-GCST90029025 | rs13173394 | C | T | 0.0074 | 0.0013 | 0.63 | 5.90E-09 | 2.98E-05 | 15.9382 |  |  |
| Basal metabolic rate || id:ebi-a-GCST90029025 | rs13176855 | T | C | -0.0065 | 0.0012 | 0.42 | 4.60E-08 | 2.50E-05 | 13.3762 |  |  |
| Basal metabolic rate || id:ebi-a-GCST90029025 | rs13185520 | A | G | -0.0075 | 0.0012 | 0.57 | 2.90E-10 | 3.47E-05 | 18.5112 |  |  |
| Basal metabolic rate || id:ebi-a-GCST90029025 | rs13244614 | A | C | 0.0117 | 0.0013 | 0.28 | 1.20E-18 | 5.69E-05 | 30.3734 |  |  |
| Basal metabolic rate || id:ebi-a-GCST90029025 | rs33973388 | T | G | 0.0113 | 0.0012 | 0.44 | 2.60E-20 | 7.78E-05 | 41.5491 |  |  |
| Basal metabolic rate || id:ebi-a-GCST90029025 | rs13392666 | A | T | 0.0081 | 0.0015 | 0.22 | 1.80E-08 | 1.98E-05 | 10.5702 |  |  |
| Basal metabolic rate || id:ebi-a-GCST90029025 | rs13430869 | T | G | 0.0127 | 0.0014 | 0.74 | 7.70E-21 | 6.00E-05 | 32.0503 |  |  |
| Basal metabolic rate || id:ebi-a-GCST90029025 | rs1360371 | C | T | 0.0156 | 0.0015 | 0.77 | 2.90E-27 | 7.48E-05 | 39.9639 |  |  |
| Basal metabolic rate || id:ebi-a-GCST90029025 | rs1374370 | A | G | 0.0089 | 0.0013 | 0.31 | 1.60E-11 | 3.69E-05 | 19.6842 |  |  |
| Basal metabolic rate || id:ebi-a-GCST90029025 | rs1412234 | C | T | 0.0128 | 0.0013 | 0.33 | 6.50E-24 | 7.97E-05 | 42.5744 |  |  |
| Basal metabolic rate || id:ebi-a-GCST90029025 | rs141729694 | T | C | 0.0224 | 0.0023 | 0.07 | 2.90E-22 | 2.38E-05 | 12.6976 |  |  |
| Basal metabolic rate || id:ebi-a-GCST90029025 | rs1421035 | T | C | 0.0077 | 0.0013 | 0.35 | 1.60E-09 | 3.02E-05 | 16.1433 |  |  |
| Basal metabolic rate || id:ebi-a-GCST90029025 | rs1424371 | T | C | 0.0068 | 0.0013 | 0.36 | 2.90E-08 | 2.49E-05 | 13.2775 |  |  |
| Basal metabolic rate || id:ebi-a-GCST90029025 | rs1431663 | C | A | -0.0104 | 0.0012 | 0.57 | 2.70E-17 | 6.55E-05 | 34.9694 |  |  |
| Basal metabolic rate || id:ebi-a-GCST90029025 | rs143384 | G | A | 0.0336 | 0.0012 | 0.40 | 5.00E-163 | 6.57E-04 | 351.2377 |  |  |
| Basal metabolic rate || id:ebi-a-GCST90029025 | rs1439287 | A | G | 0.0091 | 0.0012 | 0.48 | 6.60E-14 | 5.22E-05 | 27.8622 |  |  |
| Basal metabolic rate || id:ebi-a-GCST90029025 | rs1443536 | G | A | 0.0123 | 0.0013 | 0.30 | 1.50E-20 | 6.85E-05 | 36.5980 |  |  |
| Basal metabolic rate || id:ebi-a-GCST90029025 | rs1452822 | A | T | 0.0165 | 0.0013 | 0.28 | 2.80E-35 | 1.14E-04 | 61.0250 |  |  |
| Basal metabolic rate || id:ebi-a-GCST90029025 | rs1472852 | A | C | -0.0287 | 0.0017 | 0.16 | 1.50E-68 | 1.48E-04 | 78.9892 |  |  |
| Basal metabolic rate || id:ebi-a-GCST90029025 | rs1517248 | G | A | -0.0076 | 0.0013 | 0.66 | 3.60E-09 | 2.98E-05 | 15.9354 |  |  |
| Basal metabolic rate || id:ebi-a-GCST90029025 | rs1521624 | A | C | -0.0095 | 0.0012 | 0.47 | 4.00E-15 | 5.54E-05 | 29.6142 |  |  |
| Basal metabolic rate || id:ebi-a-GCST90029025 | rs3765351 | T | C | -0.0085 | 0.0012 | 0.54 | 1.60E-13 | 4.64E-05 | 24.7838 |  |  |
| Basal metabolic rate || id:ebi-a-GCST90029025 | rs1553065 | A | G | -0.0077 | 0.0012 | 0.43 | 2.40E-10 | 3.58E-05 | 19.1043 |  |  |
| Basal metabolic rate || id:ebi-a-GCST90029025 | rs3778157 | C | T | 0.0110 | 0.0016 | 0.17 | 4.20E-12 | 2.42E-05 | 12.9347 |  |  |
| Basal metabolic rate || id:ebi-a-GCST90029025 | rs1582931 | A | G | -0.0186 | 0.0012 | 0.47 | 1.20E-52 | 2.15E-04 | 114.6483 |  |  |
| Basal metabolic rate || id:ebi-a-GCST90029025 | rs1599473 | T | G | -0.0115 | 0.0014 | 0.24 | 4.90E-16 | 4.53E-05 | 24.2046 |  |  |
| Basal metabolic rate || id:ebi-a-GCST90029025 | rs3845344 | T | C | 0.0092 | 0.0012 | 0.39 | 3.50E-14 | 4.92E-05 | 26.2637 |  |  |
| Basal metabolic rate || id:ebi-a-GCST90029025 | rs1657222 | A | G | 0.0085 | 0.0012 | 0.40 | 1.30E-11 | 4.16E-05 | 22.2259 |  |  |
| Basal metabolic rate || id:ebi-a-GCST90029025 | rs16996637 | T | C | 0.0132 | 0.0018 | 0.13 | 7.70E-13 | 2.18E-05 | 11.6562 |  |  |
| Basal metabolic rate || id:ebi-a-GCST90029025 | rs17042011 | T | C | 0.0092 | 0.0015 | 0.21 | 9.00E-10 | 2.25E-05 | 12.0249 |  |  |
| Basal metabolic rate || id:ebi-a-GCST90029025 | rs17115481 | A | G | -0.0105 | 0.0014 | 0.27 | 3.20E-14 | 4.33E-05 | 23.1054 |  |  |
| Basal metabolic rate || id:ebi-a-GCST90029025 | rs17197114 | C | T | 0.0128 | 0.0016 | 0.18 | 1.50E-15 | 3.46E-05 | 18.5027 |  |  |
| Basal metabolic rate || id:ebi-a-GCST90029025 | rs1721382 | A | C | 0.0078 | 0.0013 | 0.65 | 5.30E-11 | 3.18E-05 | 16.9754 |  |  |
| Basal metabolic rate || id:ebi-a-GCST90029025 | rs1722322 | G | T | -0.0080 | 0.0014 | 0.27 | 2.30E-09 | 2.50E-05 | 13.3713 |  |  |
| Basal metabolic rate || id:ebi-a-GCST90029025 | rs41271299 | T | C | 0.0400 | 0.0027 | 0.05 | 2.90E-48 | 3.86E-05 | 20.6363 |  |  |
| Basal metabolic rate || id:ebi-a-GCST90029025 | rs41311445 | C | A | -0.0238 | 0.0021 | 0.10 | 8.90E-31 | 4.23E-05 | 22.5896 |  |  |
| Basal metabolic rate || id:ebi-a-GCST90029025 | rs17491275 | G | T | 0.0151 | 0.0017 | 0.16 | 8.90E-20 | 4.15E-05 | 22.1726 |  |  |
| Basal metabolic rate || id:ebi-a-GCST90029025 | rs1765133 | T | C | -0.0098 | 0.0015 | 0.23 | 5.10E-11 | 3.01E-05 | 16.0525 |  |  |
| Basal metabolic rate || id:ebi-a-GCST90029025 | rs4240326 | G | A | -0.0204 | 0.0012 | 0.55 | 5.20E-62 | 2.58E-04 | 137.9329 |  |  |
| Basal metabolic rate || id:ebi-a-GCST90029025 | rs17708997 | G | A | 0.0144 | 0.0019 | 0.11 | 2.80E-14 | 2.07E-05 | 11.0687 |  |  |
| Basal metabolic rate || id:ebi-a-GCST90029025 | rs17812715 | T | G | 0.0077 | 0.0012 | 0.41 | 6.10E-10 | 3.50E-05 | 18.7161 |  |  |
| Basal metabolic rate || id:ebi-a-GCST90029025 | rs1795323 | G | T | 0.0064 | 0.0012 | 0.50 | 4.00E-08 | 2.57E-05 | 13.7277 |  |  |
| Basal metabolic rate || id:ebi-a-GCST90029025 | rs1813212 | G | A | -0.0085 | 0.0012 | 0.45 | 2.60E-12 | 4.43E-05 | 23.6783 |  |  |
| Basal metabolic rate || id:ebi-a-GCST90029025 | rs1857423 | C | T | 0.0083 | 0.0014 | 0.27 | 5.00E-09 | 2.65E-05 | 14.1677 |  |  |
| Basal metabolic rate || id:ebi-a-GCST90029025 | rs1883798 | G | A | -0.0086 | 0.0014 | 0.73 | 1.70E-10 | 2.84E-05 | 15.1843 |  |  |
| Basal metabolic rate || id:ebi-a-GCST90029025 | rs1910466 | C | T | -0.0083 | 0.0012 | 0.50 | 2.10E-11 | 4.37E-05 | 23.3614 |  |  |
| Basal metabolic rate || id:ebi-a-GCST90029025 | rs1919442 | G | A | -0.0087 | 0.0014 | 0.77 | 1.20E-09 | 2.50E-05 | 13.3456 |  |  |
| Basal metabolic rate || id:ebi-a-GCST90029025 | rs1927635 | C | T | 0.0085 | 0.0013 | 0.35 | 2.60E-11 | 3.72E-05 | 19.8764 |  |  |
| Basal metabolic rate || id:ebi-a-GCST90029025 | rs1941697 | A | G | 0.0078 | 0.0012 | 0.45 | 1.20E-10 | 3.73E-05 | 19.9212 |  |  |
| Basal metabolic rate || id:ebi-a-GCST90029025 | rs1960268 | T | G | 0.0078 | 0.0014 | 0.75 | 5.10E-09 | 2.21E-05 | 11.7817 |  |  |
| Basal metabolic rate || id:ebi-a-GCST90029025 | rs1971955 | G | A | -0.0129 | 0.0017 | 0.85 | 1.70E-14 | 2.61E-05 | 13.9253 |  |  |
| Basal metabolic rate || id:ebi-a-GCST90029025 | rs1984119 | C | T | -0.0134 | 0.0014 | 0.26 | 2.60E-21 | 6.45E-05 | 34.4514 |  |  |
| Basal metabolic rate || id:ebi-a-GCST90029025 | rs2005172 | C | A | 0.0198 | 0.0013 | 0.64 | 4.10E-55 | 2.06E-04 | 109.9776 |  |  |
| Basal metabolic rate || id:ebi-a-GCST90029025 | rs2025129 | G | A | -0.0085 | 0.0014 | 0.75 | 6.10E-09 | 2.51E-05 | 13.4103 |  |  |
| Basal metabolic rate || id:ebi-a-GCST90029025 | rs2045767 | G | T | -0.0075 | 0.0012 | 0.56 | 4.90E-09 | 3.37E-05 | 17.9770 |  |  |
| Basal metabolic rate || id:ebi-a-GCST90029025 | rs204928 | G | A | -0.0083 | 0.0012 | 0.51 | 5.20E-12 | 4.39E-05 | 23.4544 |  |  |
| Basal metabolic rate || id:ebi-a-GCST90029025 | rs4776970 | T | A | -0.0130 | 0.0013 | 0.36 | 3.70E-26 | 8.99E-05 | 47.9899 |  |  |
| Basal metabolic rate || id:ebi-a-GCST90029025 | rs2101975 | G | A | -0.0154 | 0.0012 | 0.43 | 1.20E-35 | 1.44E-04 | 76.9266 |  |  |
| Basal metabolic rate || id:ebi-a-GCST90029025 | rs4800670 | C | G | -0.0069 | 0.0013 | 0.39 | 3.00E-08 | 2.69E-05 | 14.3406 |  |  |
| Basal metabolic rate || id:ebi-a-GCST90029025 | rs2104449 | T | G | 0.0121 | 0.0013 | 0.28 | 1.40E-18 | 6.22E-05 | 33.2282 |  |  |
| Basal metabolic rate || id:ebi-a-GCST90029025 | rs2119753 | G | A | -0.0076 | 0.0012 | 0.39 | 9.80E-10 | 3.36E-05 | 17.9672 |  |  |
| Basal metabolic rate || id:ebi-a-GCST90029025 | rs2122823 | T | C | 0.0105 | 0.0015 | 0.21 | 5.30E-12 | 3.00E-05 | 16.0168 |  |  |
| Basal metabolic rate || id:ebi-a-GCST90029025 | rs212538 | C | A | 0.0079 | 0.0012 | 0.52 | 6.30E-11 | 3.89E-05 | 20.7531 |  |  |
| Basal metabolic rate || id:ebi-a-GCST90029025 | rs214247 | C | T | -0.0087 | 0.0012 | 0.39 | 1.20E-12 | 4.33E-05 | 23.1276 |  |  |
| Basal metabolic rate || id:ebi-a-GCST90029025 | rs2163832 | C | T | -0.0127 | 0.0013 | 0.66 | 1.60E-22 | 8.10E-05 | 43.2758 |  |  |
| Basal metabolic rate || id:ebi-a-GCST90029025 | rs2192158 | G | A | -0.0073 | 0.0012 | 0.55 | 4.70E-10 | 3.29E-05 | 17.5869 |  |  |
| Basal metabolic rate || id:ebi-a-GCST90029025 | rs2197563 | A | G | 0.0103 | 0.0012 | 0.60 | 2.40E-16 | 6.32E-05 | 33.7361 |  |  |
| Basal metabolic rate || id:ebi-a-GCST90029025 | rs2197780 | C | T | 0.0117 | 0.0013 | 0.72 | 2.90E-18 | 5.73E-05 | 30.6108 |  |  |
| Basal metabolic rate || id:ebi-a-GCST90029025 | rs2214964 | T | C | -0.0071 | 0.0012 | 0.55 | 2.00E-08 | 3.16E-05 | 16.8976 |  |  |
| Basal metabolic rate || id:ebi-a-GCST90029025 | rs2230590 | C | T | 0.0143 | 0.0012 | 0.52 | 4.90E-33 | 1.29E-04 | 69.1155 |  |  |
| Basal metabolic rate || id:ebi-a-GCST90029025 | rs223942 | G | A | -0.0087 | 0.0012 | 0.62 | 1.30E-12 | 4.34E-05 | 23.1919 |  |  |
| Basal metabolic rate || id:ebi-a-GCST90029025 | rs224045 | C | T | -0.0081 | 0.0012 | 0.58 | 9.20E-11 | 3.86E-05 | 20.5934 |  |  |
| Basal metabolic rate || id:ebi-a-GCST90029025 | rs2252720 | T | C | -0.0131 | 0.0013 | 0.67 | 2.70E-24 | 8.25E-05 | 44.0816 |  |  |
| Basal metabolic rate || id:ebi-a-GCST90029025 | rs2265309 | C | T | -0.0125 | 0.0012 | 0.52 | 1.00E-25 | 9.87E-05 | 52.7027 |  |  |
| Basal metabolic rate || id:ebi-a-GCST90029025 | rs2270894 | G | C | -0.0184 | 0.0016 | 0.20 | 1.80E-32 | 8.40E-05 | 44.8632 |  |  |
| Basal metabolic rate || id:ebi-a-GCST90029025 | rs2280141 | G | T | 0.0119 | 0.0012 | 0.47 | 4.60E-22 | 8.88E-05 | 47.4045 |  |  |
| Basal metabolic rate || id:ebi-a-GCST90029025 | rs2281175 | C | T | 0.0114 | 0.0013 | 0.41 | 7.40E-19 | 6.99E-05 | 37.3159 |  |  |
| Basal metabolic rate || id:ebi-a-GCST90029025 | rs2284932 | A | G | 0.0071 | 0.0012 | 0.41 | 8.00E-09 | 2.98E-05 | 15.9128 |  |  |
| Basal metabolic rate || id:ebi-a-GCST90029025 | rs2286028 | C | G | 0.0166 | 0.0015 | 0.20 | 2.70E-29 | 7.13E-05 | 38.1027 |  |  |
| Basal metabolic rate || id:ebi-a-GCST90029025 | rs56304624 | A | G | -0.0068 | 0.0012 | 0.42 | 2.50E-08 | 2.69E-05 | 14.3912 |  |  |
| Basal metabolic rate || id:ebi-a-GCST90029025 | rs2290616 | T | C | 0.0082 | 0.0014 | 0.27 | 4.20E-09 | 2.67E-05 | 14.2492 |  |  |
| Basal metabolic rate || id:ebi-a-GCST90029025 | rs2296316 | C | T | -0.0101 | 0.0012 | 0.46 | 2.20E-16 | 6.31E-05 | 33.6925 |  |  |
| Basal metabolic rate || id:ebi-a-GCST90029025 | rs2307111 | C | T | -0.0180 | 0.0012 | 0.39 | 1.30E-47 | 1.88E-04 | 100.6235 |  |  |
| Basal metabolic rate || id:ebi-a-GCST90029025 | rs5771118 | C | T | 0.0092 | 0.0014 | 0.74 | 1.10E-10 | 3.04E-05 | 16.2590 |  |  |
| Basal metabolic rate || id:ebi-a-GCST90029025 | rs236587 | C | T | -0.0084 | 0.0014 | 0.74 | 9.30E-10 | 2.64E-05 | 14.0750 |  |  |
| Basal metabolic rate || id:ebi-a-GCST90029025 | rs2386887 | C | A | 0.0075 | 0.0013 | 0.31 | 1.50E-08 | 2.65E-05 | 14.1293 |  |  |
| Basal metabolic rate || id:ebi-a-GCST90029025 | rs238819 | C | T | 0.0095 | 0.0016 | 0.18 | 2.60E-09 | 1.97E-05 | 10.5363 |  |  |
| Basal metabolic rate || id:ebi-a-GCST90029025 | rs244711 | T | C | 0.0168 | 0.0014 | 0.69 | 8.10E-34 | 1.16E-04 | 61.9302 |  |  |
| Basal metabolic rate || id:ebi-a-GCST90029025 | rs60071805 | A | G | 0.0075 | 0.0013 | 0.32 | 3.80E-08 | 2.67E-05 | 14.2667 |  |  |
| Basal metabolic rate || id:ebi-a-GCST90029025 | rs2533879 | A | G | -0.0210 | 0.0013 | 0.30 | 1.40E-55 | 1.97E-04 | 105.3165 |  |  |
| Basal metabolic rate || id:ebi-a-GCST90029025 | rs2568958 | A | G | 0.0118 | 0.0012 | 0.60 | 1.20E-22 | 8.27E-05 | 44.1762 |  |  |
| Basal metabolic rate || id:ebi-a-GCST90029025 | rs2569993 | C | T | 0.0080 | 0.0013 | 0.32 | 7.30E-10 | 3.04E-05 | 16.2374 |  |  |
| Basal metabolic rate || id:ebi-a-GCST90029025 | rs2578246 | A | G | -0.0094 | 0.0015 | 0.81 | 5.60E-10 | 2.16E-05 | 11.5305 |  |  |
| Basal metabolic rate || id:ebi-a-GCST90029025 | rs2592208 | A | C | -0.0066 | 0.0012 | 0.51 | 3.50E-08 | 2.73E-05 | 14.5627 |  |  |
| Basal metabolic rate || id:ebi-a-GCST90029025 | rs2602713 | C | A | 0.0109 | 0.0012 | 0.44 | 2.90E-18 | 7.09E-05 | 37.8597 |  |  |
| Basal metabolic rate || id:ebi-a-GCST90029025 | rs2611732 | G | A | 0.0079 | 0.0012 | 0.60 | 2.30E-10 | 3.62E-05 | 19.3556 |  |  |
| Basal metabolic rate || id:ebi-a-GCST90029025 | rs2615074 | A | G | 0.0097 | 0.0013 | 0.38 | 2.80E-15 | 5.24E-05 | 27.9717 |  |  |
| Basal metabolic rate || id:ebi-a-GCST90029025 | rs61775433 | G | A | 0.0132 | 0.0016 | 0.18 | 2.90E-17 | 3.76E-05 | 20.0897 |  |  |
| Basal metabolic rate || id:ebi-a-GCST90029025 | rs2650965 | G | A | -0.0090 | 0.0013 | 0.33 | 1.60E-11 | 3.91E-05 | 20.8699 |  |  |
| Basal metabolic rate || id:ebi-a-GCST90029025 | rs2658797 | T | C | -0.0066 | 0.0012 | 0.48 | 3.50E-08 | 2.77E-05 | 14.7810 |  |  |
| Basal metabolic rate || id:ebi-a-GCST90029025 | rs2678204 | G | T | 0.0134 | 0.0013 | 0.34 | 2.90E-26 | 9.21E-05 | 49.1914 |  |  |
| Basal metabolic rate || id:ebi-a-GCST90029025 | rs2716212 | G | A | 0.0071 | 0.0013 | 0.38 | 1.80E-08 | 2.81E-05 | 15.0065 |  |  |
| Basal metabolic rate || id:ebi-a-GCST90029025 | rs62372052 | G | A | 0.0246 | 0.0019 | 0.11 | 1.70E-36 | 5.87E-05 | 31.3722 |  |  |
| Basal metabolic rate || id:ebi-a-GCST90029025 | rs2740761 | T | C | 0.0091 | 0.0015 | 0.21 | 5.90E-09 | 2.23E-05 | 11.9177 |  |  |
| Basal metabolic rate || id:ebi-a-GCST90029025 | rs632224 | G | A | -0.0121 | 0.0012 | 0.43 | 1.30E-22 | 8.82E-05 | 47.0846 |  |  |
| Basal metabolic rate || id:ebi-a-GCST90029025 | rs2749807 | T | A | 0.0077 | 0.0013 | 0.34 | 2.00E-10 | 2.93E-05 | 15.6682 |  |  |
| Basal metabolic rate || id:ebi-a-GCST90029025 | rs2756895 | T | C | 0.0076 | 0.0012 | 0.52 | 1.20E-09 | 3.63E-05 | 19.3868 |  |  |
| Basal metabolic rate || id:ebi-a-GCST90029025 | rs28445331 | C | A | 0.0074 | 0.0013 | 0.63 | 2.00E-09 | 3.03E-05 | 16.1787 |  |  |
| Basal metabolic rate || id:ebi-a-GCST90029025 | rs6570509 | T | G | -0.0141 | 0.0013 | 0.29 | 2.60E-26 | 8.48E-05 | 45.3086 |  |  |
| Basal metabolic rate || id:ebi-a-GCST90029025 | rs28605759 | A | G | -0.0083 | 0.0012 | 0.46 | 7.60E-12 | 4.37E-05 | 23.3331 |  |  |
| Basal metabolic rate || id:ebi-a-GCST90029025 | rs2866719 | T | C | 0.0102 | 0.0013 | 0.37 | 1.70E-15 | 5.71E-05 | 30.4958 |  |  |
| Basal metabolic rate || id:ebi-a-GCST90029025 | rs28701981 | C | T | 0.0168 | 0.0013 | 0.35 | 2.60E-40 | 1.46E-04 | 78.0565 |  |  |
| Basal metabolic rate || id:ebi-a-GCST90029025 | rs67362530 | A | G | -0.0155 | 0.0019 | 0.12 | 1.80E-17 | 2.55E-05 | 13.5979 |  |  |
| Basal metabolic rate || id:ebi-a-GCST90029025 | rs2950446 | C | T | -0.0140 | 0.0016 | 0.82 | 5.40E-19 | 4.41E-05 | 23.5525 |  |  |
| Basal metabolic rate || id:ebi-a-GCST90029025 | rs2952615 | C | G | -0.0125 | 0.0012 | 0.62 | 2.90E-23 | 8.89E-05 | 47.4876 |  |  |
| Basal metabolic rate || id:ebi-a-GCST90029025 | rs2970592 | A | G | 0.0081 | 0.0012 | 0.59 | 2.70E-11 | 4.02E-05 | 21.4710 |  |  |
| Basal metabolic rate || id:ebi-a-GCST90029025 | rs29946 | C | T | 0.0077 | 0.0012 | 0.56 | 2.10E-09 | 3.55E-05 | 18.9794 |  |  |
| Basal metabolic rate || id:ebi-a-GCST90029025 | rs3013301 | A | G | -0.0069 | 0.0013 | 0.35 | 4.70E-08 | 2.46E-05 | 13.1565 |  |  |
| Basal metabolic rate || id:ebi-a-GCST90029025 | rs310796 | T | G | 0.0102 | 0.0013 | 0.68 | 9.10E-16 | 5.00E-05 | 26.6917 |  |  |
| Basal metabolic rate || id:ebi-a-GCST90029025 | rs3110496 | G | A | 0.0077 | 0.0013 | 0.69 | 1.00E-08 | 2.74E-05 | 14.6480 |  |  |
| Basal metabolic rate || id:ebi-a-GCST90029025 | rs3116201 | A | G | -0.0175 | 0.0020 | 0.10 | 6.40E-18 | 2.45E-05 | 13.0622 |  |  |
| Basal metabolic rate || id:ebi-a-GCST90029025 | rs3116603 | C | G | -0.0274 | 0.0015 | 0.22 | 1.30E-77 | 2.15E-04 | 115.1060 |  |  |
| Basal metabolic rate || id:ebi-a-GCST90029025 | rs31210 | A | G | -0.0120 | 0.0014 | 0.25 | 3.20E-17 | 5.19E-05 | 27.6983 |  |  |
| Basal metabolic rate || id:ebi-a-GCST90029025 | rs3212260 | T | A | 0.0131 | 0.0014 | 0.26 | 1.80E-21 | 6.34E-05 | 33.8556 |  |  |
| Basal metabolic rate || id:ebi-a-GCST90029025 | rs32736 | G | T | 0.0068 | 0.0013 | 0.35 | 4.00E-08 | 2.43E-05 | 13.0035 |  |  |
| Basal metabolic rate || id:ebi-a-GCST90029025 | rs7033487 | C | T | -0.0210 | 0.0015 | 0.20 | 1.10E-42 | 1.12E-04 | 59.6650 |  |  |
| Basal metabolic rate || id:ebi-a-GCST90029025 | rs34693680 | T | C | 0.0128 | 0.0018 | 0.13 | 1.40E-13 | 2.22E-05 | 11.8353 |  |  |
| Basal metabolic rate || id:ebi-a-GCST90029025 | rs34776209 | T | C | -0.0156 | 0.0014 | 0.25 | 3.00E-28 | 8.51E-05 | 45.4528 |  |  |
| Basal metabolic rate || id:ebi-a-GCST90029025 | rs34825238 | T | G | 0.0081 | 0.0014 | 0.25 | 1.10E-08 | 2.34E-05 | 12.5078 |  |  |
| Basal metabolic rate || id:ebi-a-GCST90029025 | rs34848742 | G | T | -0.0149 | 0.0015 | 0.79 | 3.00E-24 | 6.24E-05 | 33.3174 |  |  |
| Basal metabolic rate || id:ebi-a-GCST90029025 | rs34879158 | C | A | -0.0198 | 0.0014 | 0.26 | 1.40E-47 | 1.48E-04 | 78.8257 |  |  |
| Basal metabolic rate || id:ebi-a-GCST90029025 | rs35050648 | T | G | 0.0091 | 0.0014 | 0.24 | 1.90E-10 | 2.70E-05 | 14.4052 |  |  |
| Basal metabolic rate || id:ebi-a-GCST90029025 | rs35446432 | T | C | 0.0071 | 0.0013 | 0.33 | 1.90E-08 | 2.50E-05 | 13.3468 |  |  |
| Basal metabolic rate || id:ebi-a-GCST90029025 | rs35467921 | T | C | 0.0220 | 0.0012 | 0.40 | 1.90E-72 | 2.83E-04 | 151.0848 |  |  |
| Basal metabolic rate || id:ebi-a-GCST90029025 | rs35492502 | A | G | 0.0097 | 0.0013 | 0.30 | 2.50E-13 | 4.17E-05 | 22.2751 |  |  |
| Basal metabolic rate || id:ebi-a-GCST90029025 | rs35506085 | A | G | -0.0186 | 0.0016 | 0.18 | 9.00E-31 | 7.83E-05 | 41.7960 |  |  |
| Basal metabolic rate || id:ebi-a-GCST90029025 | rs359938 | G | A | -0.0092 | 0.0014 | 0.23 | 1.70E-10 | 2.71E-05 | 14.4904 |  |  |
| Basal metabolic rate || id:ebi-a-GCST90029025 | rs36000545 | G | A | -0.0158 | 0.0013 | 0.40 | 1.10E-36 | 1.40E-04 | 74.9782 |  |  |
| Basal metabolic rate || id:ebi-a-GCST90029025 | rs36073309 | A | G | 0.0083 | 0.0013 | 0.33 | 1.50E-10 | 3.44E-05 | 18.3843 |  |  |
| Basal metabolic rate || id:ebi-a-GCST90029025 | rs36089326 | T | A | 0.0074 | 0.0013 | 0.33 | 7.80E-09 | 2.67E-05 | 14.2586 |  |  |
| Basal metabolic rate || id:ebi-a-GCST90029025 | rs365352 | A | G | -0.0148 | 0.0014 | 0.24 | 1.20E-27 | 7.69E-05 | 41.0540 |  |  |
| Basal metabolic rate || id:ebi-a-GCST90029025 | rs3759094 | T | C | -0.0116 | 0.0013 | 0.34 | 2.50E-19 | 6.88E-05 | 36.7441 |  |  |
| Basal metabolic rate || id:ebi-a-GCST90029025 | rs7245985 | G | T | -0.0111 | 0.0015 | 0.21 | 3.00E-13 | 3.32E-05 | 17.7360 |  |  |
| Basal metabolic rate || id:ebi-a-GCST90029025 | rs3772051 | A | G | -0.0082 | 0.0014 | 0.24 | 8.80E-09 | 2.19E-05 | 11.6691 |  |  |
| Basal metabolic rate || id:ebi-a-GCST90029025 | rs72697614 | A | C | 0.0078 | 0.0013 | 0.32 | 9.90E-10 | 2.85E-05 | 15.2439 |  |  |
| Basal metabolic rate || id:ebi-a-GCST90029025 | rs3778934 | C | A | -0.0074 | 0.0013 | 0.34 | 2.30E-09 | 2.82E-05 | 15.0781 |  |  |
| Basal metabolic rate || id:ebi-a-GCST90029025 | rs3808424 | C | T | -0.0157 | 0.0015 | 0.22 | 4.10E-26 | 7.24E-05 | 38.6813 |  |  |
| Basal metabolic rate || id:ebi-a-GCST90029025 | rs72801843 | A | T | 0.0161 | 0.0013 | 0.30 | 3.60E-35 | 1.17E-04 | 62.3621 |  |  |
| Basal metabolic rate || id:ebi-a-GCST90029025 | rs3853252 | A | G | 0.0152 | 0.0012 | 0.45 | 4.30E-36 | 1.44E-04 | 77.0006 |  |  |
| Basal metabolic rate || id:ebi-a-GCST90029025 | rs390192 | G | A | -0.0100 | 0.0012 | 0.52 | 2.50E-17 | 6.32E-05 | 33.7530 |  |  |
| Basal metabolic rate || id:ebi-a-GCST90029025 | rs3925 | A | G | -0.0100 | 0.0014 | 0.25 | 3.40E-12 | 3.48E-05 | 18.5963 |  |  |
| Basal metabolic rate || id:ebi-a-GCST90029025 | rs394487 | T | C | 0.0111 | 0.0014 | 0.28 | 2.70E-17 | 5.05E-05 | 26.9919 |  |  |
| Basal metabolic rate || id:ebi-a-GCST90029025 | rs3998115 | C | G | 0.0089 | 0.0013 | 0.60 | 1.10E-12 | 4.48E-05 | 23.9453 |  |  |
| Basal metabolic rate || id:ebi-a-GCST90029025 | rs40393 | C | T | 0.0077 | 0.0012 | 0.61 | 1.60E-09 | 3.38E-05 | 18.0615 |  |  |
| Basal metabolic rate || id:ebi-a-GCST90029025 | rs4055791 | T | C | -0.0091 | 0.0012 | 0.42 | 1.90E-14 | 4.96E-05 | 26.4746 |  |  |
| Basal metabolic rate || id:ebi-a-GCST90029025 | rs73619441 | G | T | -0.0135 | 0.0017 | 0.14 | 4.50E-15 | 2.75E-05 | 14.6905 |  |  |
| Basal metabolic rate || id:ebi-a-GCST90029025 | rs7377083 | A | C | 0.0096 | 0.0012 | 0.43 | 1.90E-15 | 5.53E-05 | 29.5285 |  |  |
| Basal metabolic rate || id:ebi-a-GCST90029025 | rs4132132 | C | T | 0.0094 | 0.0012 | 0.44 | 7.40E-15 | 5.34E-05 | 28.5451 |  |  |
| Basal metabolic rate || id:ebi-a-GCST90029025 | rs73966422 | G | C | 0.0150 | 0.0018 | 0.12 | 1.70E-16 | 2.68E-05 | 14.3121 |  |  |
| Basal metabolic rate || id:ebi-a-GCST90029025 | rs741409 | T | C | 0.0108 | 0.0017 | 0.16 | 9.60E-11 | 2.10E-05 | 11.2266 |  |  |
| Basal metabolic rate || id:ebi-a-GCST90029025 | rs4257594 | T | C | -0.0073 | 0.0013 | 0.64 | 2.60E-08 | 2.89E-05 | 15.4318 |  |  |
| Basal metabolic rate || id:ebi-a-GCST90029025 | rs4282339 | A | G | -0.0171 | 0.0015 | 0.21 | 3.70E-31 | 8.11E-05 | 43.3316 |  |  |
| Basal metabolic rate || id:ebi-a-GCST90029025 | rs4291242 | C | T | 0.0083 | 0.0015 | 0.77 | 5.10E-09 | 2.14E-05 | 11.4118 |  |  |
| Basal metabolic rate || id:ebi-a-GCST90029025 | rs4325427 | T | C | -0.0102 | 0.0013 | 0.29 | 1.10E-13 | 4.38E-05 | 23.3782 |  |  |
| Basal metabolic rate || id:ebi-a-GCST90029025 | rs4369382 | G | A | -0.0102 | 0.0014 | 0.74 | 6.50E-14 | 3.98E-05 | 21.2376 |  |  |
| Basal metabolic rate || id:ebi-a-GCST90029025 | rs4369779 | C | T | 0.0249 | 0.0015 | 0.79 | 4.60E-61 | 1.73E-04 | 92.3933 |  |  |
| Basal metabolic rate || id:ebi-a-GCST90029025 | rs4439140 | A | G | -0.0097 | 0.0013 | 0.42 | 6.10E-15 | 5.39E-05 | 28.8128 |  |  |
| Basal metabolic rate || id:ebi-a-GCST90029025 | rs4525525 | T | G | -0.0106 | 0.0014 | 0.26 | 1.30E-14 | 4.20E-05 | 22.4230 |  |  |
| Basal metabolic rate || id:ebi-a-GCST90029025 | rs45528934 | T | C | 0.0174 | 0.0017 | 0.16 | 5.10E-26 | 5.62E-05 | 30.0094 |  |  |
| Basal metabolic rate || id:ebi-a-GCST90029025 | rs7665127 | T | C | 0.0099 | 0.0013 | 0.35 | 1.90E-14 | 4.99E-05 | 26.6516 |  |  |
| Basal metabolic rate || id:ebi-a-GCST90029025 | rs4588572 | G | A | 0.0093 | 0.0014 | 0.23 | 2.90E-11 | 2.75E-05 | 14.6854 |  |  |
| Basal metabolic rate || id:ebi-a-GCST90029025 | rs4648626 | A | C | 0.0079 | 0.0012 | 0.46 | 5.40E-11 | 3.94E-05 | 21.0338 |  |  |
| Basal metabolic rate || id:ebi-a-GCST90029025 | rs4675617 | G | A | 0.0107 | 0.0016 | 0.83 | 3.00E-11 | 2.24E-05 | 11.9756 |  |  |
| Basal metabolic rate || id:ebi-a-GCST90029025 | rs4676442 | C | T | 0.0075 | 0.0013 | 0.36 | 3.90E-10 | 3.01E-05 | 16.0789 |  |  |
| Basal metabolic rate || id:ebi-a-GCST90029025 | rs77093479 | G | C | -0.0112 | 0.0017 | 0.17 | 2.10E-11 | 2.36E-05 | 12.5930 |  |  |
| Basal metabolic rate || id:ebi-a-GCST90029025 | rs4715207 | T | C | 0.0222 | 0.0016 | 0.18 | 1.70E-45 | 1.09E-04 | 58.1171 |  |  |
| Basal metabolic rate || id:ebi-a-GCST90029025 | rs4727295 | A | G | -0.0170 | 0.0016 | 0.83 | 2.20E-26 | 5.95E-05 | 31.7592 |  |  |
| Basal metabolic rate || id:ebi-a-GCST90029025 | rs7728690 | T | C | -0.0097 | 0.0012 | 0.39 | 1.30E-14 | 5.35E-05 | 28.5923 |  |  |
| Basal metabolic rate || id:ebi-a-GCST90029025 | rs4795318 | T | C | 0.0086 | 0.0012 | 0.52 | 2.60E-12 | 4.67E-05 | 24.9376 |  |  |
| Basal metabolic rate || id:ebi-a-GCST90029025 | rs773145 | C | G | -0.0070 | 0.0012 | 0.42 | 3.10E-09 | 2.92E-05 | 15.5737 |  |  |
| Basal metabolic rate || id:ebi-a-GCST90029025 | rs4821940 | C | T | -0.0084 | 0.0012 | 0.55 | 1.90E-11 | 4.31E-05 | 22.9982 |  |  |
| Basal metabolic rate || id:ebi-a-GCST90029025 | rs4865956 | A | T | -0.0105 | 0.0013 | 0.70 | 2.10E-15 | 4.99E-05 | 26.6753 |  |  |
| Basal metabolic rate || id:ebi-a-GCST90029025 | rs4899012 | C | G | -0.0210 | 0.0013 | 0.61 | 3.90E-64 | 2.51E-04 | 134.1819 |  |  |
| Basal metabolic rate || id:ebi-a-GCST90029025 | rs4900715 | A | G | -0.0087 | 0.0012 | 0.51 | 1.40E-13 | 4.80E-05 | 25.6265 |  |  |
| Basal metabolic rate || id:ebi-a-GCST90029025 | rs4909912 | T | C | -0.0173 | 0.0012 | 0.43 | 2.10E-45 | 1.80E-04 | 96.1421 |  |  |
| Basal metabolic rate || id:ebi-a-GCST90029025 | rs4912537 | T | C | -0.0125 | 0.0014 | 0.24 | 5.70E-19 | 5.33E-05 | 28.4439 |  |  |
| Basal metabolic rate || id:ebi-a-GCST90029025 | rs4912905 | C | G | -0.0101 | 0.0014 | 0.25 | 7.60E-13 | 3.60E-05 | 19.2075 |  |  |
| Basal metabolic rate || id:ebi-a-GCST90029025 | rs4948293 | A | G | -0.0105 | 0.0015 | 0.21 | 1.10E-12 | 3.04E-05 | 16.2230 |  |  |
| Basal metabolic rate || id:ebi-a-GCST90029025 | rs4980826 | A | C | 0.0083 | 0.0012 | 0.40 | 3.60E-11 | 4.04E-05 | 21.5588 |  |  |
| Basal metabolic rate || id:ebi-a-GCST90029025 | rs5019542 | T | C | -0.0089 | 0.0013 | 0.64 | 1.20E-13 | 4.36E-05 | 23.2876 |  |  |
| Basal metabolic rate || id:ebi-a-GCST90029025 | rs520161 | C | T | -0.0111 | 0.0013 | 0.70 | 1.30E-15 | 5.44E-05 | 29.0759 |  |  |
| Basal metabolic rate || id:ebi-a-GCST90029025 | rs528378 | C | A | 0.0071 | 0.0013 | 0.63 | 1.40E-08 | 2.75E-05 | 14.6714 |  |  |
| Basal metabolic rate || id:ebi-a-GCST90029025 | rs532499 | C | T | -0.0086 | 0.0014 | 0.74 | 4.70E-10 | 2.75E-05 | 14.7006 |  |  |
| Basal metabolic rate || id:ebi-a-GCST90029025 | rs540652 | T | C | 0.0101 | 0.0012 | 0.47 | 3.70E-16 | 6.56E-05 | 35.0587 |  |  |
| Basal metabolic rate || id:ebi-a-GCST90029025 | rs55674305 | A | G | -0.0096 | 0.0013 | 0.31 | 1.20E-13 | 4.22E-05 | 22.5488 |  |  |
| Basal metabolic rate || id:ebi-a-GCST90029025 | rs8042545 | A | G | 0.0121 | 0.0014 | 0.24 | 7.70E-18 | 4.93E-05 | 26.3301 |  |  |
| Basal metabolic rate || id:ebi-a-GCST90029025 | rs55831773 | T | C | -0.0151 | 0.0016 | 0.20 | 5.10E-22 | 5.60E-05 | 29.9160 |  |  |
| Basal metabolic rate || id:ebi-a-GCST90029025 | rs8074074 | T | C | 0.0090 | 0.0014 | 0.76 | 4.20E-11 | 2.76E-05 | 14.7598 |  |  |
| Basal metabolic rate || id:ebi-a-GCST90029025 | rs56130943 | C | A | 0.0094 | 0.0015 | 0.23 | 3.00E-10 | 2.70E-05 | 14.4165 |  |  |
| Basal metabolic rate || id:ebi-a-GCST90029025 | rs56228832 | A | T | -0.0199 | 0.0014 | 0.24 | 1.20E-45 | 1.39E-04 | 74.0345 |  |  |
| Basal metabolic rate || id:ebi-a-GCST90029025 | rs878347 | C | T | -0.0091 | 0.0013 | 0.37 | 4.20E-13 | 4.54E-05 | 24.2266 |  |  |
| Basal metabolic rate || id:ebi-a-GCST90029025 | rs57135834 | T | C | -0.0161 | 0.0014 | 0.25 | 1.20E-29 | 9.04E-05 | 48.2939 |  |  |
| Basal metabolic rate || id:ebi-a-GCST90029025 | rs5752989 | A | G | -0.0105 | 0.0012 | 0.57 | 2.10E-17 | 6.64E-05 | 35.4883 |  |  |
| Basal metabolic rate || id:ebi-a-GCST90029025 | rs57635800 | A | G | 0.0130 | 0.0013 | 0.29 | 3.20E-23 | 7.22E-05 | 38.5706 |  |  |
| Basal metabolic rate || id:ebi-a-GCST90029025 | rs9327336 | C | T | 0.0088 | 0.0013 | 0.34 | 5.80E-12 | 4.05E-05 | 21.6450 |  |  |
| Basal metabolic rate || id:ebi-a-GCST90029025 | rs582780 | G | A | 0.0153 | 0.0012 | 0.42 | 1.60E-34 | 1.40E-04 | 74.9754 |  |  |
| Basal metabolic rate || id:ebi-a-GCST90029025 | rs58584712 | A | G | 0.0090 | 0.0015 | 0.21 | 1.30E-09 | 2.33E-05 | 12.4382 |  |  |
| Basal metabolic rate || id:ebi-a-GCST90029025 | rs599004 | T | C | -0.0101 | 0.0013 | 0.28 | 2.40E-14 | 4.25E-05 | 22.7204 |  |  |
| Basal metabolic rate || id:ebi-a-GCST90029025 | rs59985551 | T | C | -0.0179 | 0.0014 | 0.23 | 2.90E-35 | 1.01E-04 | 54.0263 |  |  |
| Basal metabolic rate || id:ebi-a-GCST90029025 | rs9399656 | T | C | -0.0084 | 0.0012 | 0.46 | 7.40E-12 | 4.42E-05 | 23.5793 |  |  |
| Basal metabolic rate || id:ebi-a-GCST90029025 | rs60077625 | A | G | 0.0142 | 0.0013 | 0.31 | 1.60E-27 | 9.64E-05 | 51.5074 |  |  |
| Basal metabolic rate || id:ebi-a-GCST90029025 | rs6026578 | G | C | -0.0101 | 0.0013 | 0.63 | 2.60E-15 | 5.57E-05 | 29.7589 |  |  |
| Basal metabolic rate || id:ebi-a-GCST90029025 | rs6056342 | A | G | -0.0077 | 0.0013 | 0.66 | 7.50E-10 | 2.98E-05 | 15.9043 |  |  |
| Basal metabolic rate || id:ebi-a-GCST90029025 | rs60667771 | C | T | 0.0105 | 0.0017 | 0.16 | 1.80E-10 | 2.02E-05 | 10.8039 |  |  |
| Basal metabolic rate || id:ebi-a-GCST90029025 | rs9564268 | C | T | -0.0083 | 0.0013 | 0.62 | 8.40E-11 | 3.85E-05 | 20.5603 |  |  |
| Basal metabolic rate || id:ebi-a-GCST90029025 | rs6124249 | C | T | 0.0075 | 0.0013 | 0.32 | 4.10E-09 | 2.54E-05 | 13.5527 |  |  |
| Basal metabolic rate || id:ebi-a-GCST90029025 | rs6142059 | C | T | 0.0097 | 0.0012 | 0.49 | 1.70E-17 | 5.93E-05 | 31.6514 |  |  |
| Basal metabolic rate || id:ebi-a-GCST90029025 | rs61628776 | G | A | -0.0146 | 0.0018 | 0.14 | 3.90E-17 | 3.12E-05 | 16.6558 |  |  |
| Basal metabolic rate || id:ebi-a-GCST90029025 | rs9888533 | T | C | 0.0074 | 0.0012 | 0.54 | 1.10E-08 | 3.28E-05 | 17.5422 |  |  |
| Basal metabolic rate || id:ebi-a-GCST90029025 | rs61849823 | C | T | 0.0112 | 0.0017 | 0.16 | 2.50E-11 | 2.34E-05 | 12.5092 |  |  |
| Basal metabolic rate || id:ebi-a-GCST90029025 | rs9892365 | G | A | -0.0150 | 0.0013 | 0.67 | 3.30E-30 | 1.11E-04 | 59.2813 |  |  |
| Basal metabolic rate || id:ebi-a-GCST90029025 | rs61869763 | T | C | 0.0173 | 0.0020 | 0.10 | 3.30E-18 | 2.62E-05 | 14.0072 |  |  |
| Basal metabolic rate || id:ebi-a-GCST90029025 | rs61992671 | G | A | -0.0112 | 0.0013 | 0.49 | 2.60E-18 | 7.24E-05 | 38.6686 |  |  |
| Basal metabolic rate || id:ebi-a-GCST90029025 | rs9951619 | G | T | 0.0118 | 0.0015 | 0.77 | 2.40E-17 | 4.42E-05 | 23.5904 |  |  |
| Basal metabolic rate || id:ebi-a-GCST90029025 | rs62396185 | C | G | -0.0180 | 0.0015 | 0.26 | 5.70E-33 | 1.03E-04 | 54.8439 |  |  |
| Basal metabolic rate || id:ebi-a-GCST90029025 | rs9967287 | T | G | 0.0077 | 0.0014 | 0.25 | 3.00E-08 | 2.13E-05 | 11.3599 |  |  |
| Basal metabolic rate || id:ebi-a-GCST90029025 | rs6457762 | C | T | 0.0155 | 0.0017 | 0.16 | 1.80E-20 | 4.21E-05 | 22.4968 |  |  |
| Basal metabolic rate || id:ebi-a-GCST90029025 | rs655598 | A | G | -0.0095 | 0.0012 | 0.56 | 4.20E-15 | 5.65E-05 | 30.1664 |  |  |
| Basal metabolic rate || id:ebi-a-GCST90029025 | rs6563808 | C | T | -0.0099 | 0.0014 | 0.73 | 1.10E-12 | 3.74E-05 | 19.9517 |  |  |
| Basal metabolic rate || id:ebi-a-GCST90029025 | rs72820209 | T | A | 0.0070 | 0.0012 | 0.39 | 7.40E-09 | 2.89E-05 | 15.4281 |  |  |
| Basal metabolic rate || id:ebi-a-GCST90029025 | rs667515 | C | G | -0.0113 | 0.0013 | 0.39 | 5.20E-19 | 7.25E-05 | 38.7075 |  |  |
| Basal metabolic rate || id:ebi-a-GCST90029025 | rs6675689 | C | A | 0.0076 | 0.0013 | 0.65 | 1.00E-09 | 3.07E-05 | 16.3813 |  |  |
| Basal metabolic rate || id:ebi-a-GCST90029025 | rs6693481 | C | T | -0.0079 | 0.0013 | 0.70 | 2.70E-09 | 2.85E-05 | 15.2144 |  |  |
| Basal metabolic rate || id:ebi-a-GCST90029025 | rs73175572 | G | A | 0.0261 | 0.0019 | 0.11 | 1.30E-42 | 6.67E-05 | 35.6169 |  |  |
| Basal metabolic rate || id:ebi-a-GCST90029025 | rs6738207 | A | G | 0.0071 | 0.0012 | 0.40 | 1.50E-08 | 3.01E-05 | 16.0530 |  |  |
| Basal metabolic rate || id:ebi-a-GCST90029025 | rs6745626 | T | C | 0.0090 | 0.0012 | 0.59 | 1.90E-14 | 4.88E-05 | 26.0521 |  |  |
| Basal metabolic rate || id:ebi-a-GCST90029025 | rs6762578 | A | G | 0.0154 | 0.0015 | 0.78 | 1.60E-26 | 7.18E-05 | 38.3628 |  |  |
| Basal metabolic rate || id:ebi-a-GCST90029025 | rs6772164 | A | C | 0.0090 | 0.0013 | 0.36 | 1.60E-12 | 4.33E-05 | 23.1321 |  |  |
| Basal metabolic rate || id:ebi-a-GCST90029025 | rs6779752 | A | G | -0.0132 | 0.0013 | 0.64 | 1.10E-25 | 9.32E-05 | 49.7888 |  |  |
| Basal metabolic rate || id:ebi-a-GCST90029025 | rs6804915 | A | C | 0.0090 | 0.0013 | 0.29 | 3.00E-12 | 3.55E-05 | 18.9517 |  |  |
| Basal metabolic rate || id:ebi-a-GCST90029025 | rs6821305 | C | A | 0.0128 | 0.0012 | 0.40 | 9.20E-25 | 9.62E-05 | 51.3855 |  |  |
| Basal metabolic rate || id:ebi-a-GCST90029025 | rs6874142 | G | T | 0.0172 | 0.0020 | 0.11 | 1.10E-17 | 2.74E-05 | 14.6078 |  |  |
| Basal metabolic rate || id:ebi-a-GCST90029025 | rs6902789 | A | G | 0.0110 | 0.0013 | 0.37 | 1.50E-18 | 6.65E-05 | 35.5110 |  |  |
| Basal metabolic rate || id:ebi-a-GCST90029025 | rs7487292 | G | T | 0.0102 | 0.0012 | 0.45 | 2.60E-17 | 6.43E-05 | 34.3403 |  |  |
| Basal metabolic rate || id:ebi-a-GCST90029025 | rs6946091 | G | A | 0.0186 | 0.0013 | 0.63 | 9.40E-50 | 1.90E-04 | 101.7437 |  |  |
| Basal metabolic rate || id:ebi-a-GCST90029025 | rs6975015 | A | G | 0.0169 | 0.0019 | 0.12 | 2.70E-19 | 3.06E-05 | 16.3669 |  |  |
| Basal metabolic rate || id:ebi-a-GCST90029025 | rs7546249 | A | T | 0.0152 | 0.0014 | 0.73 | 8.60E-30 | 9.32E-05 | 49.7877 |  |  |
| Basal metabolic rate || id:ebi-a-GCST90029025 | rs703593 | G | A | -0.0112 | 0.0012 | 0.48 | 2.90E-20 | 8.00E-05 | 42.7325 |  |  |
| Basal metabolic rate || id:ebi-a-GCST90029025 | rs7072873 | T | C | -0.0106 | 0.0012 | 0.54 | 2.90E-18 | 6.91E-05 | 36.9066 |  |  |
| Basal metabolic rate || id:ebi-a-GCST90029025 | rs7080472 | T | G | 0.0110 | 0.0012 | 0.42 | 9.10E-19 | 7.23E-05 | 38.6172 |  |  |
| Basal metabolic rate || id:ebi-a-GCST90029025 | rs7115013 | T | C | -0.0075 | 0.0012 | 0.44 | 5.70E-10 | 3.44E-05 | 18.3878 |  |  |
| Basal metabolic rate || id:ebi-a-GCST90029025 | rs7129320 | A | G | -0.0215 | 0.0016 | 0.17 | 1.80E-39 | 8.94E-05 | 47.7717 |  |  |
| Basal metabolic rate || id:ebi-a-GCST90029025 | rs7134283 | A | G | -0.0118 | 0.0014 | 0.28 | 1.50E-18 | 5.81E-05 | 31.0527 |  |  |
| Basal metabolic rate || id:ebi-a-GCST90029025 | rs7137534 | C | T | -0.0075 | 0.0013 | 0.66 | 3.80E-09 | 2.84E-05 | 15.1857 |  |  |
| Basal metabolic rate || id:ebi-a-GCST90029025 | rs71385734 | G | T | -0.0228 | 0.0016 | 0.17 | 1.30E-47 | 1.03E-04 | 54.8194 |  |  |
| Basal metabolic rate || id:ebi-a-GCST90029025 | rs71423263 | G | T | 0.0131 | 0.0017 | 0.14 | 6.60E-15 | 2.61E-05 | 13.9141 |  |  |
| Basal metabolic rate || id:ebi-a-GCST90029025 | rs7154982 | A | G | -0.0140 | 0.0014 | 0.27 | 5.70E-25 | 7.67E-05 | 40.9785 |  |  |
| Basal metabolic rate || id:ebi-a-GCST90029025 | rs7156335 | C | T | 0.0172 | 0.0021 | 0.09 | 8.10E-16 | 2.02E-05 | 10.7811 |  |  |
| Basal metabolic rate || id:ebi-a-GCST90029025 | rs7188009 | A | G | 0.0084 | 0.0012 | 0.40 | 1.20E-11 | 4.15E-05 | 22.1583 |  |  |
| Basal metabolic rate || id:ebi-a-GCST90029025 | rs7199856 | T | G | -0.0084 | 0.0014 | 0.75 | 7.80E-10 | 2.47E-05 | 13.1960 |  |  |
| Basal metabolic rate || id:ebi-a-GCST90029025 | rs7223535 | A | G | -0.0247 | 0.0014 | 0.27 | 1.60E-73 | 2.40E-04 | 128.1672 |  |  |
| Basal metabolic rate || id:ebi-a-GCST90029025 | rs723149 | G | A | -0.0111 | 0.0012 | 0.56 | 6.70E-19 | 7.54E-05 | 40.2451 |  |  |
| Basal metabolic rate || id:ebi-a-GCST90029025 | rs724016 | G | A | 0.0297 | 0.0012 | 0.44 | 8.59E-136 | 5.49E-04 | 293.4690 |  |  |
| Basal metabolic rate || id:ebi-a-GCST90029025 | rs7758804 | T | C | 0.0074 | 0.0012 | 0.39 | 1.90E-08 | 3.15E-05 | 16.8287 |  |  |
| Basal metabolic rate || id:ebi-a-GCST90029025 | rs72656010 | C | T | -0.0347 | 0.0018 | 0.13 | 6.20E-82 | 1.59E-04 | 85.1399 |  |  |
| Basal metabolic rate || id:ebi-a-GCST90029025 | rs77848106 | A | C | -0.0090 | 0.0013 | 0.30 | 2.10E-12 | 3.55E-05 | 18.9738 |  |  |
| Basal metabolic rate || id:ebi-a-GCST90029025 | rs72755233 | A | G | -0.0146 | 0.0019 | 0.11 | 1.10E-13 | 2.12E-05 | 11.3081 |  |  |
| Basal metabolic rate || id:ebi-a-GCST90029025 | rs72771080 | T | C | 0.0138 | 0.0015 | 0.21 | 3.50E-21 | 5.38E-05 | 28.7578 |  |  |
| Basal metabolic rate || id:ebi-a-GCST90029025 | rs7925214 | T | C | 0.0074 | 0.0012 | 0.52 | 1.00E-09 | 3.41E-05 | 18.2073 |  |  |
| Basal metabolic rate || id:ebi-a-GCST90029025 | rs7952436 | T | C | -0.0329 | 0.0022 | 0.08 | 8.60E-51 | 6.21E-05 | 33.1771 |  |  |
| Basal metabolic rate || id:ebi-a-GCST90029025 | rs7301341 | C | T | -0.0095 | 0.0013 | 0.33 | 1.20E-13 | 4.42E-05 | 23.5926 |  |  |
| Basal metabolic rate || id:ebi-a-GCST90029025 | rs73052033 | C | T | -0.0169 | 0.0016 | 0.19 | 7.30E-27 | 6.59E-05 | 35.1719 |  |  |
| Basal metabolic rate || id:ebi-a-GCST90029025 | rs73081811 | G | T | 0.0088 | 0.0012 | 0.53 | 2.60E-13 | 4.86E-05 | 25.9432 |  |  |
| Basal metabolic rate || id:ebi-a-GCST90029025 | rs8017780 | A | C | -0.0093 | 0.0015 | 0.21 | 3.40E-10 | 2.40E-05 | 12.7980 |  |  |
| Basal metabolic rate || id:ebi-a-GCST90029025 | rs7321045 | A | G | 0.0095 | 0.0012 | 0.45 | 2.50E-15 | 5.41E-05 | 28.9002 |  |  |
| Basal metabolic rate || id:ebi-a-GCST90029025 | rs73213484 | T | A | -0.0134 | 0.0017 | 0.14 | 4.70E-14 | 2.68E-05 | 14.3202 |  |  |
| Basal metabolic rate || id:ebi-a-GCST90029025 | rs76513770 | C | T | -0.0167 | 0.0018 | 0.13 | 1.10E-20 | 3.51E-05 | 18.7695 |  |  |
| Basal metabolic rate || id:ebi-a-GCST90029025 | rs8066863 | G | A | -0.0176 | 0.0019 | 0.12 | 1.40E-19 | 3.25E-05 | 17.3620 |  |  |
| Basal metabolic rate || id:ebi-a-GCST90029025 | rs73791415 | T | G | -0.0072 | 0.0013 | 0.36 | 2.40E-08 | 2.76E-05 | 14.7506 |  |  |
| Basal metabolic rate || id:ebi-a-GCST90029025 | rs8132129 | T | C | -0.0093 | 0.0016 | 0.18 | 1.10E-08 | 1.93E-05 | 10.3014 |  |  |
| Basal metabolic rate || id:ebi-a-GCST90029025 | rs822549 | C | T | 0.0120 | 0.0014 | 0.27 | 5.80E-19 | 5.56E-05 | 29.6698 |  |  |
| Basal metabolic rate || id:ebi-a-GCST90029025 | rs7691068 | C | T | 0.0066 | 0.0012 | 0.51 | 4.60E-08 | 2.80E-05 | 14.9519 |  |  |
| Basal metabolic rate || id:ebi-a-GCST90029025 | rs7460093 | A | G | 0.0097 | 0.0012 | 0.53 | 2.80E-15 | 5.84E-05 | 31.1761 |  |  |
| Basal metabolic rate || id:ebi-a-GCST90029025 | rs903162 | A | G | 0.0075 | 0.0013 | 0.31 | 8.40E-09 | 2.65E-05 | 14.1593 |  |  |
| Basal metabolic rate || id:ebi-a-GCST90029025 | rs9291926 | G | T | -0.0118 | 0.0012 | 0.53 | 2.50E-22 | 8.80E-05 | 47.0136 |  |  |
| Basal metabolic rate || id:ebi-a-GCST90029025 | rs7519259 | A | G | 0.0084 | 0.0012 | 0.53 | 4.10E-12 | 4.50E-05 | 24.0284 |  |  |
| Basal metabolic rate || id:ebi-a-GCST90029025 | rs7731023 | G | A | 0.0079 | 0.0012 | 0.57 | 1.60E-10 | 3.76E-05 | 20.0845 |  |  |
| Basal metabolic rate || id:ebi-a-GCST90029025 | rs7576796 | A | G | -0.0080 | 0.0014 | 0.78 | 4.20E-08 | 2.01E-05 | 10.7380 |  |  |
| Basal metabolic rate || id:ebi-a-GCST90029025 | rs7619139 | A | T | 0.0129 | 0.0012 | 0.59 | 1.20E-25 | 9.84E-05 | 52.5709 |  |  |
| Basal metabolic rate || id:ebi-a-GCST90029025 | rs7755185 | G | A | 0.0088 | 0.0013 | 0.31 | 1.20E-11 | 3.61E-05 | 19.2877 |  |  |
| Basal metabolic rate || id:ebi-a-GCST90029025 | rs9898189 | G | C | -0.0080 | 0.0013 | 0.64 | 8.20E-10 | 3.14E-05 | 16.7862 |  |  |
| Basal metabolic rate || id:ebi-a-GCST90029025 | rs76693355 | C | T | -0.0142 | 0.0019 | 0.12 | 3.10E-14 | 2.15E-05 | 11.4753 |  |  |
| Basal metabolic rate || id:ebi-a-GCST90029025 | rs7671407 | A | G | -0.0076 | 0.0014 | 0.72 | 2.20E-08 | 2.35E-05 | 12.5583 |  |  |
| Basal metabolic rate || id:ebi-a-GCST90029025 | rs76798800 | T | G | 0.0216 | 0.0014 | 0.27 | 1.40E-57 | 1.82E-04 | 97.4059 |  |  |
| Basal metabolic rate || id:ebi-a-GCST90029025 | rs7900548 | G | T | -0.0139 | 0.0016 | 0.17 | 1.40E-17 | 4.00E-05 | 21.3480 |  |  |
| Basal metabolic rate || id:ebi-a-GCST90029025 | rs9989141 | T | C | 0.0097 | 0.0013 | 0.63 | 3.20E-15 | 5.10E-05 | 27.2159 |  |  |
| Basal metabolic rate || id:ebi-a-GCST90029025 | rs7719688 | G | A | -0.0088 | 0.0012 | 0.46 | 2.80E-13 | 4.74E-05 | 25.3156 |  |  |
| Basal metabolic rate || id:ebi-a-GCST90029025 | rs7728095 | G | A | 0.0130 | 0.0013 | 0.39 | 4.40E-26 | 9.54E-05 | 50.9424 |  |  |
| Basal metabolic rate || id:ebi-a-GCST90029025 | rs987204 | A | G | 0.0104 | 0.0012 | 0.44 | 1.70E-17 | 6.65E-05 | 35.5215 |  |  |
| Basal metabolic rate || id:ebi-a-GCST90029025 | rs8007644 | A | G | 0.0076 | 0.0013 | 0.39 | 1.10E-09 | 3.25E-05 | 17.3673 |  |  |
| Basal metabolic rate || id:ebi-a-GCST90029025 | rs9888796 | C | T | -0.0097 | 0.0014 | 0.74 | 1.10E-12 | 3.47E-05 | 18.5139 |  |  |
| Basal metabolic rate || id:ebi-a-GCST90029025 | rs8024244 | A | G | 0.0103 | 0.0014 | 0.25 | 8.70E-13 | 3.76E-05 | 20.0634 |  |  |
| Basal metabolic rate || id:ebi-a-GCST90029025 | rs80295797 | T | C | -0.0121 | 0.0013 | 0.33 | 2.20E-21 | 7.24E-05 | 38.6532 |  |  |
| Basal metabolic rate || id:ebi-a-GCST90029025 | rs9398171 | T | C | 0.0210 | 0.0013 | 0.71 | 1.80E-56 | 1.90E-04 | 101.4838 |  |  |
| Basal metabolic rate || id:ebi-a-GCST90029025 | rs7776917 | A | G | 0.0128 | 0.0012 | 0.48 | 4.60E-26 | 1.03E-04 | 54.7579 |  |  |
| Basal metabolic rate || id:ebi-a-GCST90029025 | rs946197 | C | G | 0.0138 | 0.0014 | 0.23 | 3.00E-21 | 6.13E-05 | 32.7580 |  |  |
| Basal metabolic rate || id:ebi-a-GCST90029025 | rs7843128 | C | T | -0.0078 | 0.0013 | 0.36 | 5.00E-09 | 3.22E-05 | 17.1762 |  |  |
| Basal metabolic rate || id:ebi-a-GCST90029025 | rs9496614 | C | T | 0.0091 | 0.0014 | 0.24 | 7.90E-11 | 2.85E-05 | 15.2373 |  |  |
| Basal metabolic rate || id:ebi-a-GCST90029025 | rs9513510 | C | G | -0.0090 | 0.0013 | 0.70 | 1.30E-11 | 3.63E-05 | 19.4112 |  |  |
| Basal metabolic rate || id:ebi-a-GCST90029025 | rs9985795 | C | T | -0.0071 | 0.0012 | 0.48 | 4.10E-09 | 3.20E-05 | 17.0817 |  |  |
| Basal metabolic rate || id:ebi-a-GCST90029025 | rs7994814 | T | C | 0.0091 | 0.0013 | 0.42 | 1.10E-12 | 4.82E-05 | 25.7305 |  |  |
| Basal metabolic rate || id:ebi-a-GCST90029025 | rs9634212 | A | C | 0.0227 | 0.0015 | 0.22 | 2.90E-54 | 1.53E-04 | 81.9680 |  |  |
| Basal metabolic rate || id:ebi-a-GCST90029025 | rs9894577 | A | G | -0.0137 | 0.0013 | 0.32 | 4.70E-25 | 8.83E-05 | 47.1607 |  |  |
| Basal metabolic rate || id:ebi-a-GCST90029025 | rs9379084 | A | G | -0.0147 | 0.0020 | 0.12 | 3.80E-14 | 2.17E-05 | 11.6046 |  |  |
| Basal metabolic rate || id:ebi-a-GCST90029025 | rs9480933 | G | C | -0.0122 | 0.0013 | 0.35 | 1.40E-22 | 7.80E-05 | 41.6638 |  |  |
| Basal metabolic rate || id:ebi-a-GCST90029025 | rs9568856 | A | G | 0.0144 | 0.0018 | 0.13 | 3.40E-15 | 2.60E-05 | 13.9084 |  |  |


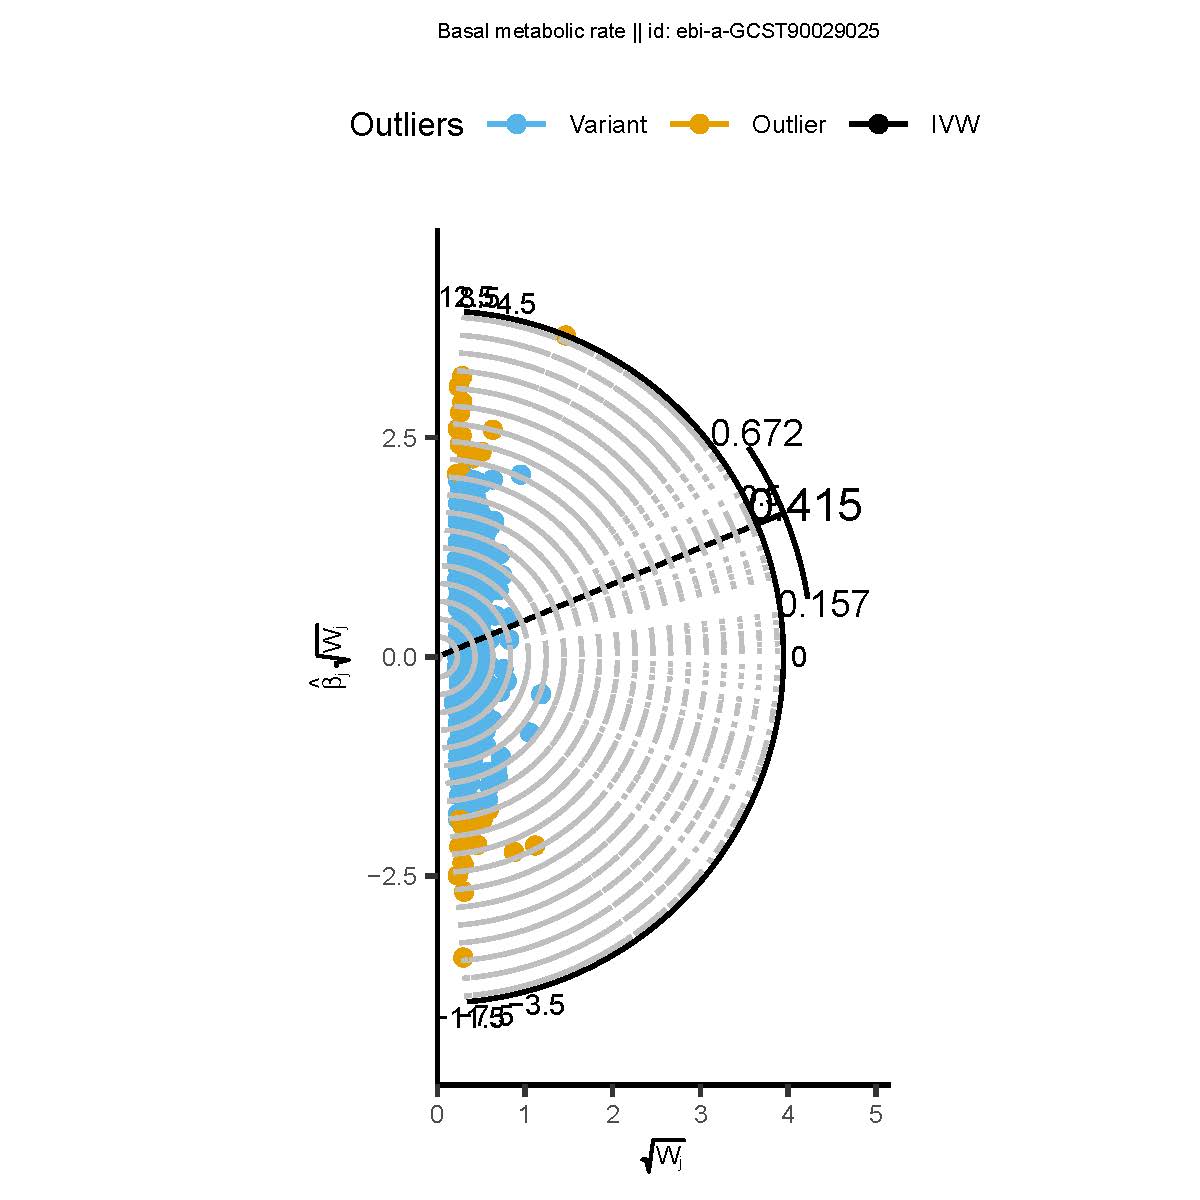


**Figure S1.** The Radial plot between genetically predicted basal metabolic rate and non-alcoholic fatty liver disease risk

**
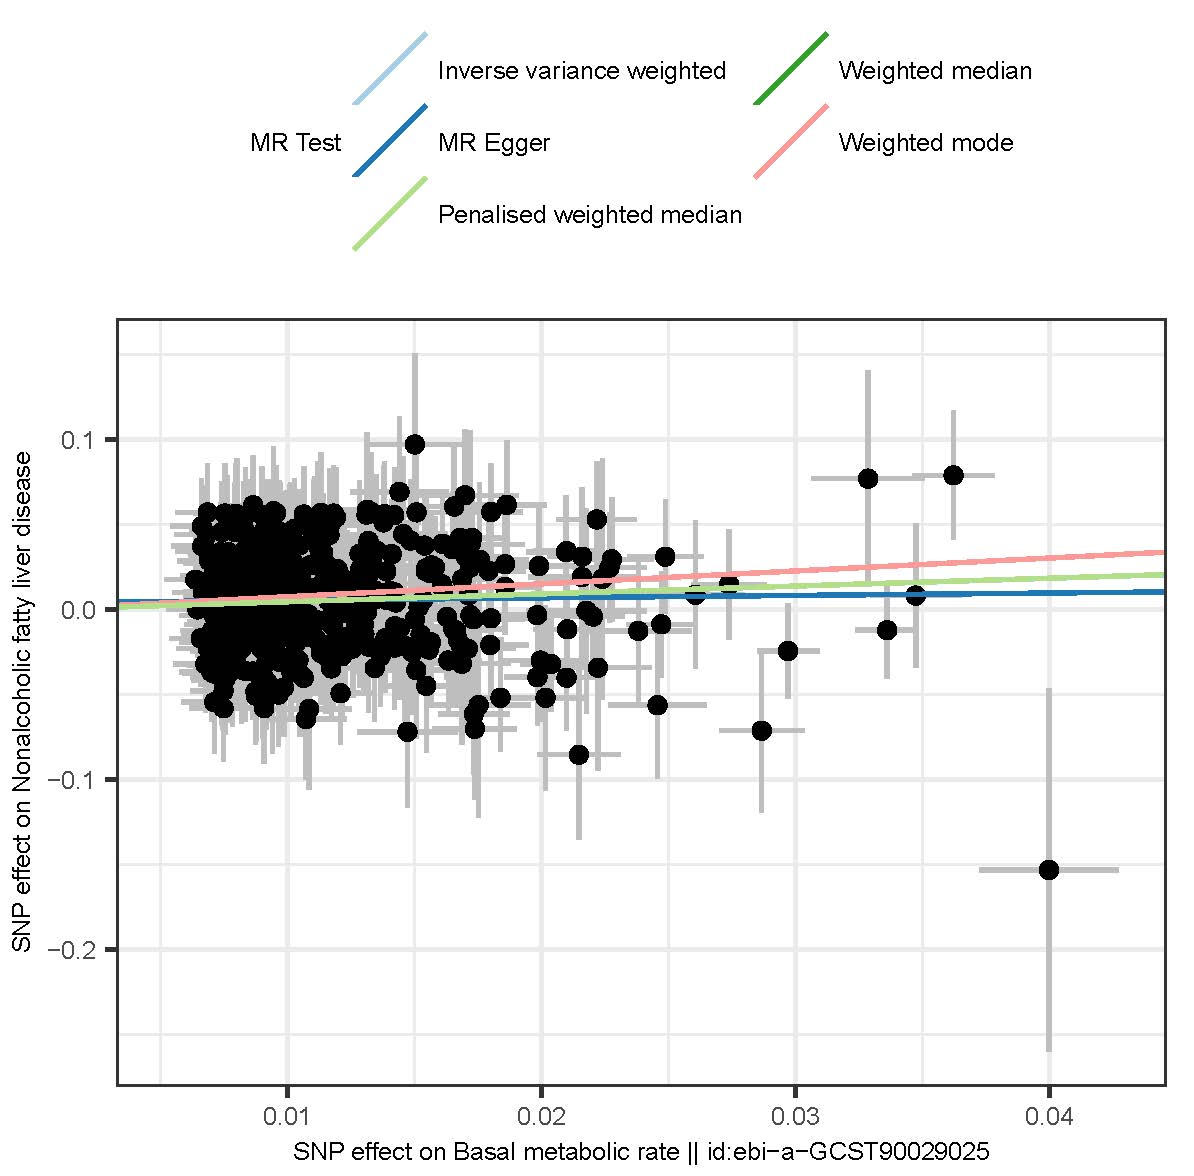
**

**Figure S2.** Scatter plot of the association between basal metabolic rate and non-alcoholic fatty liver disease


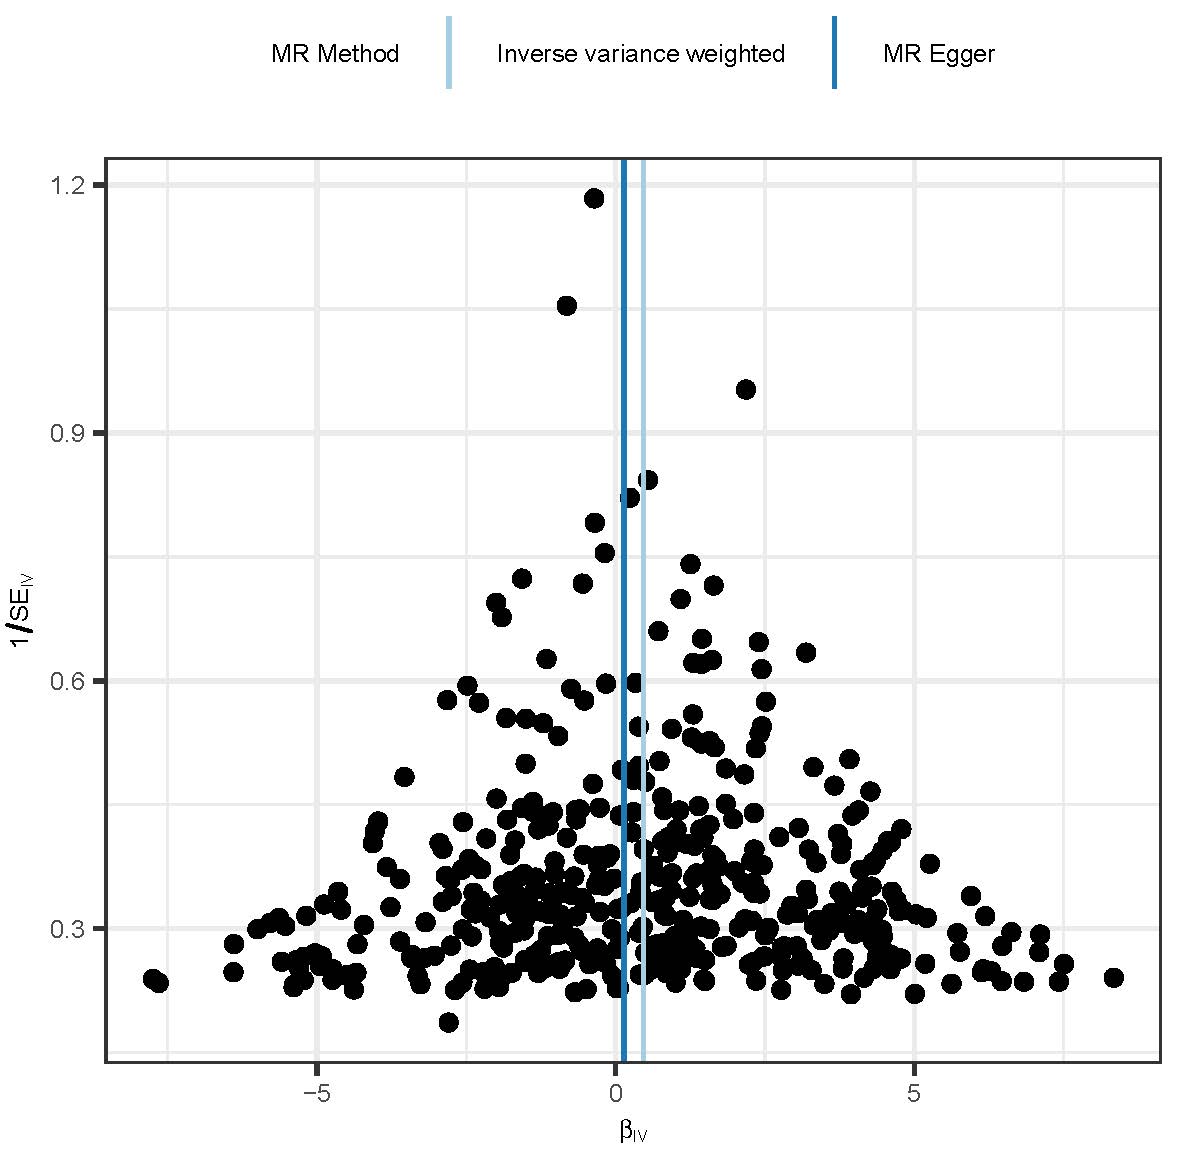


**Figure S3.** Funnel plot of Mendelian randomization estimation for the causal association between basal metabolic rate and non-alcoholic fatty liver disease
